# Supplementary material for: Metabolite Profiling of Christia vespertilionis Leaf Metabolome via Molecular Network Approach
Source: MDPI journal article supplement (doi:10.3390/app11083526), 2021-04-15
Supplement: s1 [file s1]

# **Metabolite Profiling of *Christia vespertilionis* Leaf Metabolome via Molecular Network Approach**

## **Supplementary Materials**

**Anis Irfan Norazhar <sup>1</sup>, Soo Yee Lee <sup>1</sup>, Siti Munirah Mohd Faudzi <sup>1,2</sup> and Khozirah Shaari <sup>1,2\*</sup>**

<sup>1</sup> Natural Medicines and Products Research Laboratory (NaturMeds), Institute of Bioscience, Universiti Putra Malaysia, Serdang 43400, Selangor, Malaysia; anisirfan1512@gmail.com (A.I.N.); leesooyee@upm.edu.my (S.Y.L.); sitimunirah@upm.edu.my (S.M.M.F.); khozirah@upm.edu.my (K.S.)

<sup>2</sup> Department of Chemistry, Faculty of Science, Universiti Putra Malaysia, Serdang 43400, Selangor, Malaysia; sitimunirah@upm.edu.my (S.M.M.F.); khozirah@upm.edu.my (K.S.)

\* Correspondence: khozirah@upm.edu.my; Tel.: +60-3-8942148

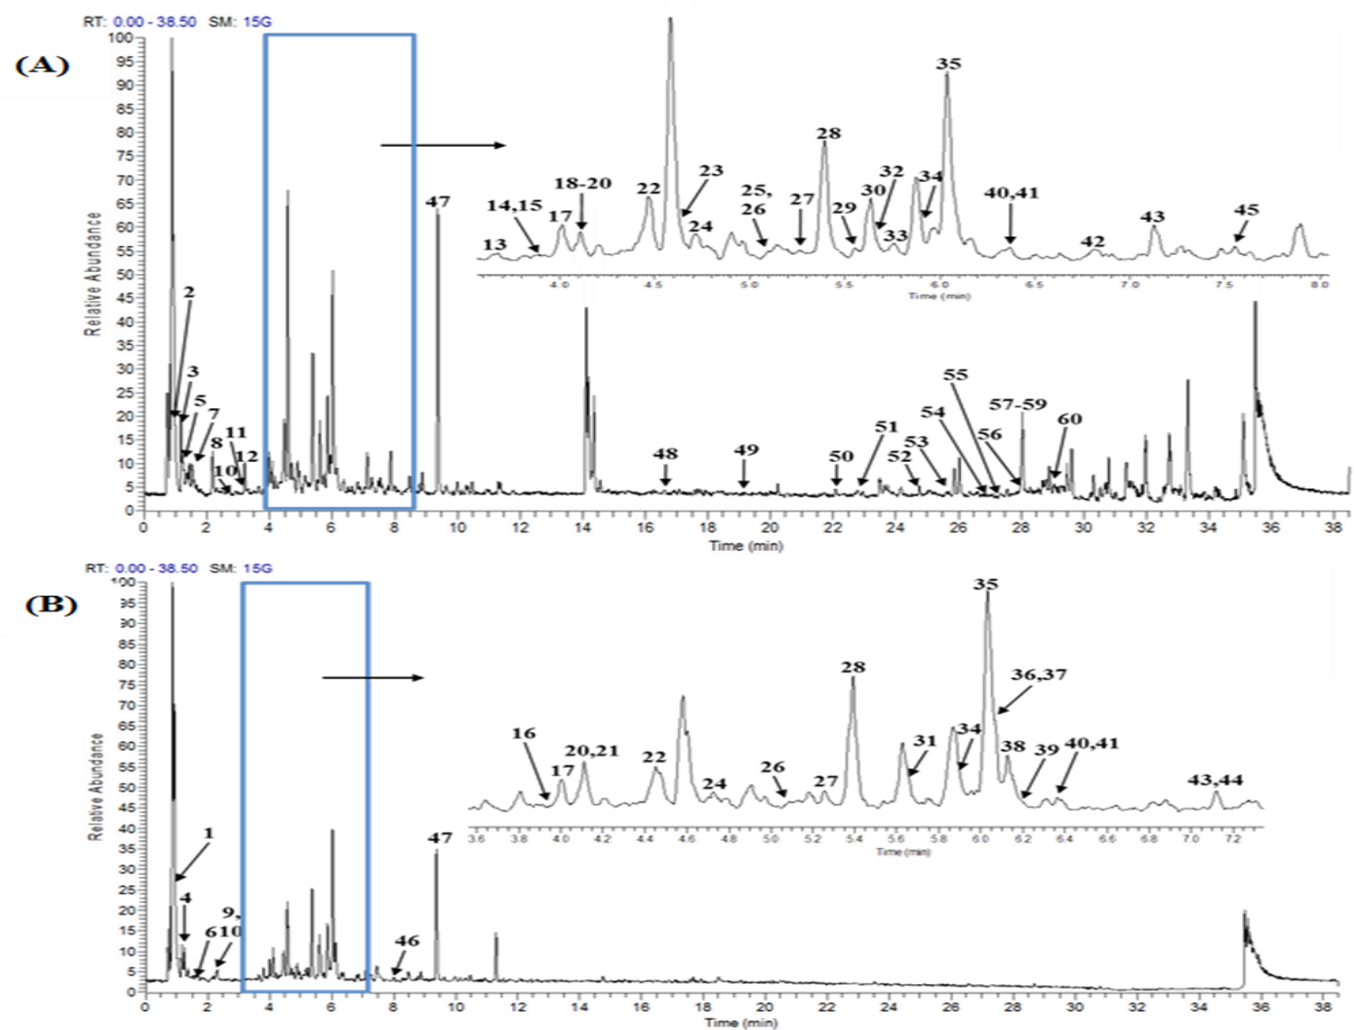

**Figure S1a.** Total ion chromatograms of the leaf methanolic extract of *Christia vespertilionis* in (A) positive and (B) negative ion modes. The number above each peak represents the peak numbers, corresponding to the identified metabolites as listed in Table 1.

RT: 4.30-9.67 SM: 15G

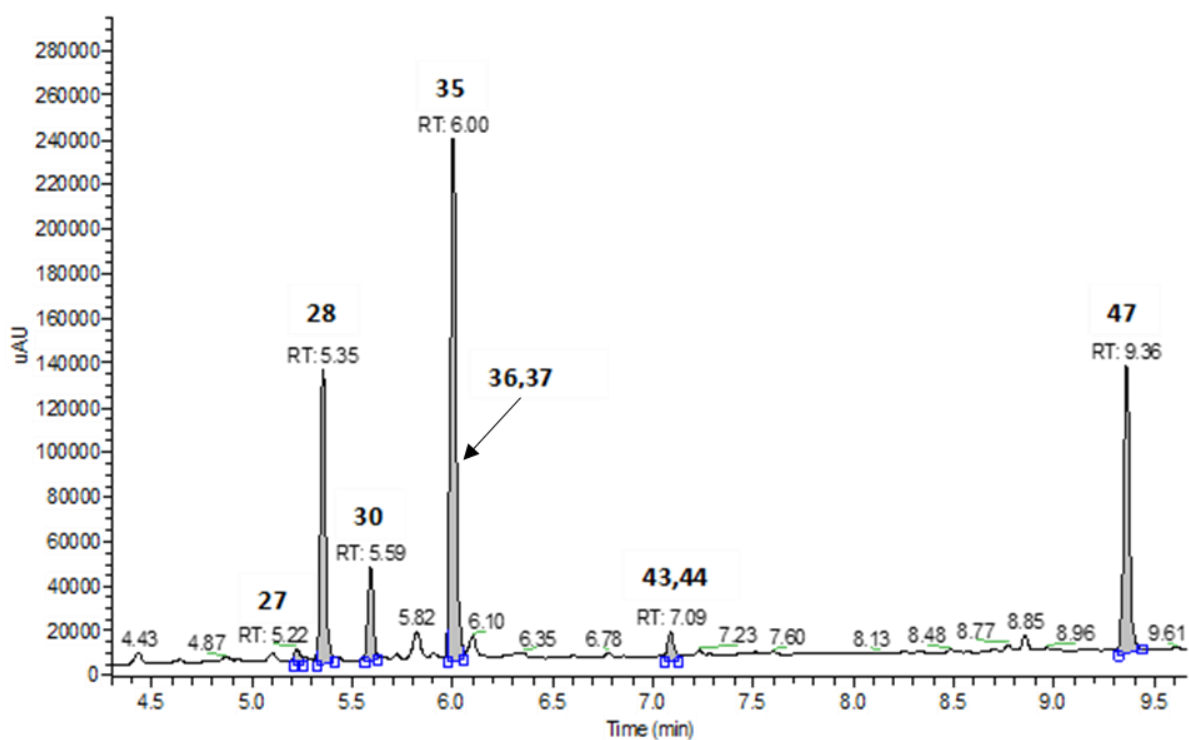

**Figure S1b.** Photodiode array chromatograms of the methanolic leaf extract of *Christia vespertilionis*. Peaks 28 and 47 were further isolated and elucidated by 1D and 2D NMR experiments. The peak integration and % area for the major metabolites (27, 28, 30, 35, 36, 37, 43, 44, and 47) are given in the Table shown below:

| Peak     | Apex RT | Start RT | End RT | %Area |
|----------|---------|----------|--------|-------|
| 27       | 5.22    | 5.20     | 5.25   | 1.10  |
| 28       | 5.35    | 5.32     | 5.41   | 18.54 |
| 30       | 5.59    | 5.56     | 5.62   | 7.08  |
| 35,36,37 | 6.00    | 5.97     | 6.05   | 42.72 |
| 43,44    | 7.09    | 7.05     | 7.13   | 2.27  |
| 47       | 9.36    | 9.32     | 9.43   | 24.47 |

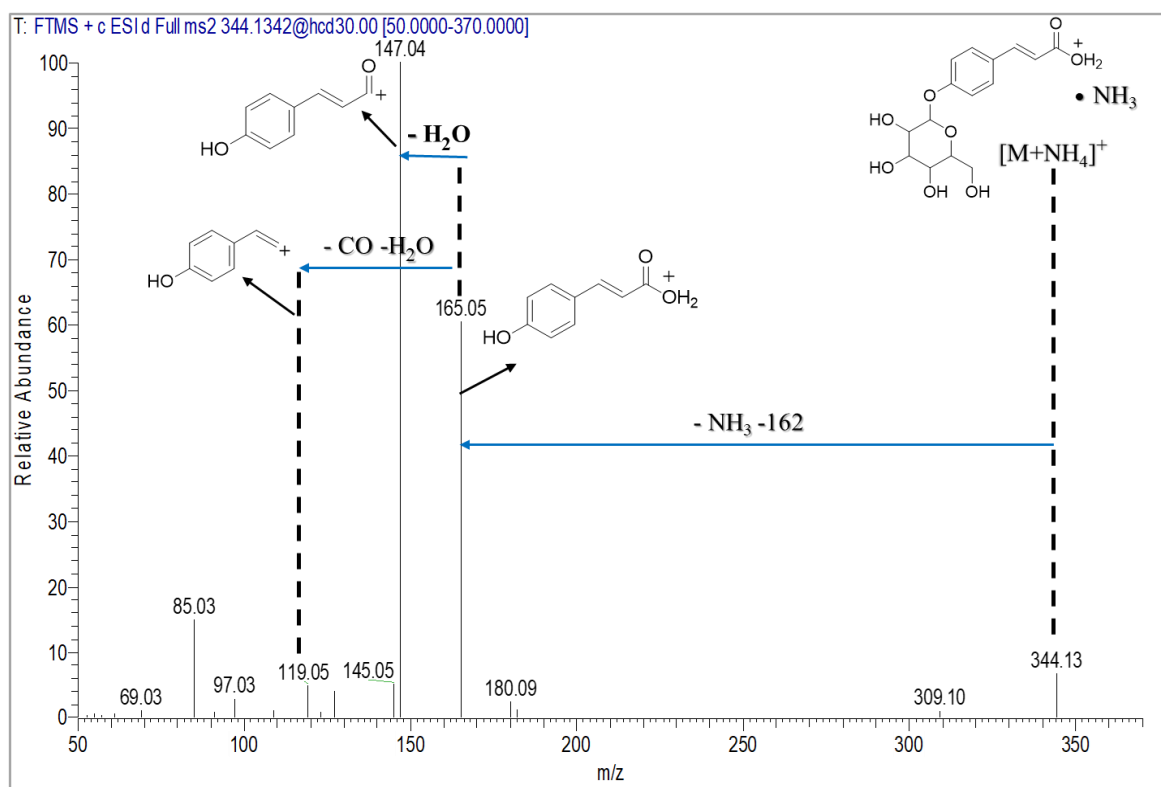

**Figure S2.** Proposed fragmentation pathway observed in MS/MS spectrum of *p*-coumaric acid 4-*O*-glucoside (**17**).

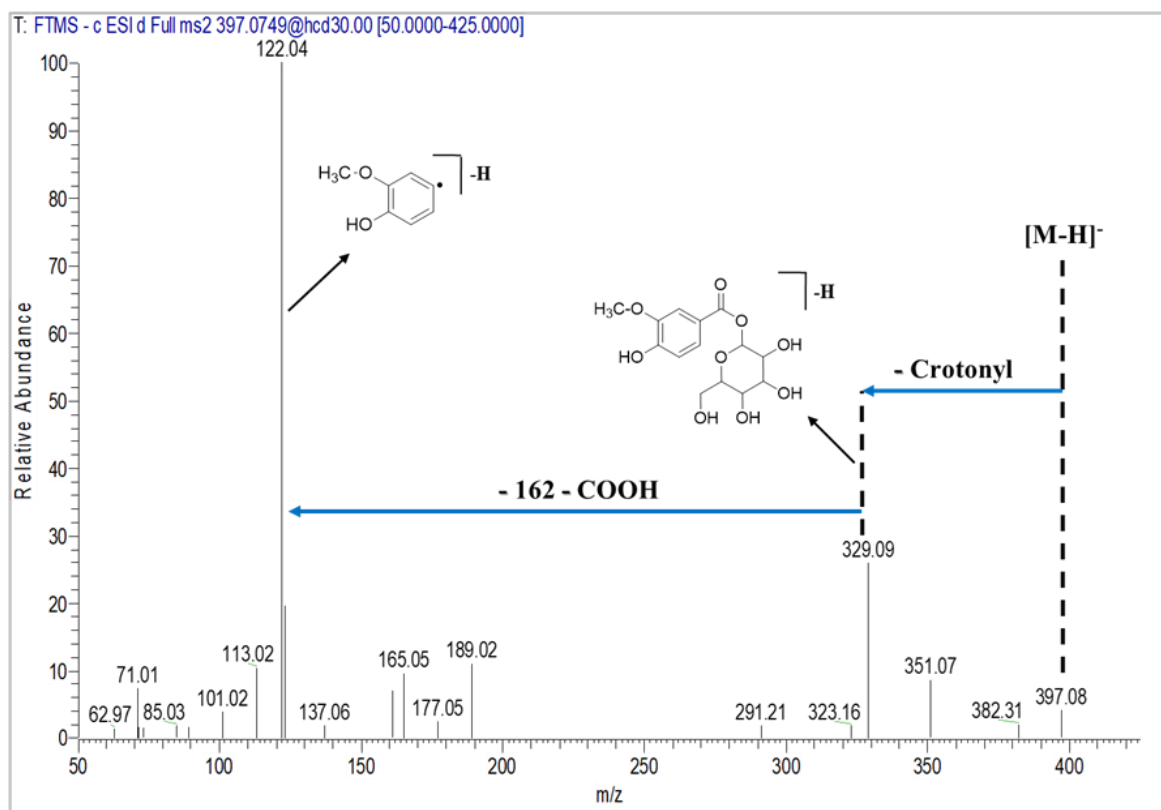

**Figure S3.** Proposed fragmentation pathway observed in MS/MS spectrum of crotonylated derivative of vanillic acid glucosyl ester (**6**).

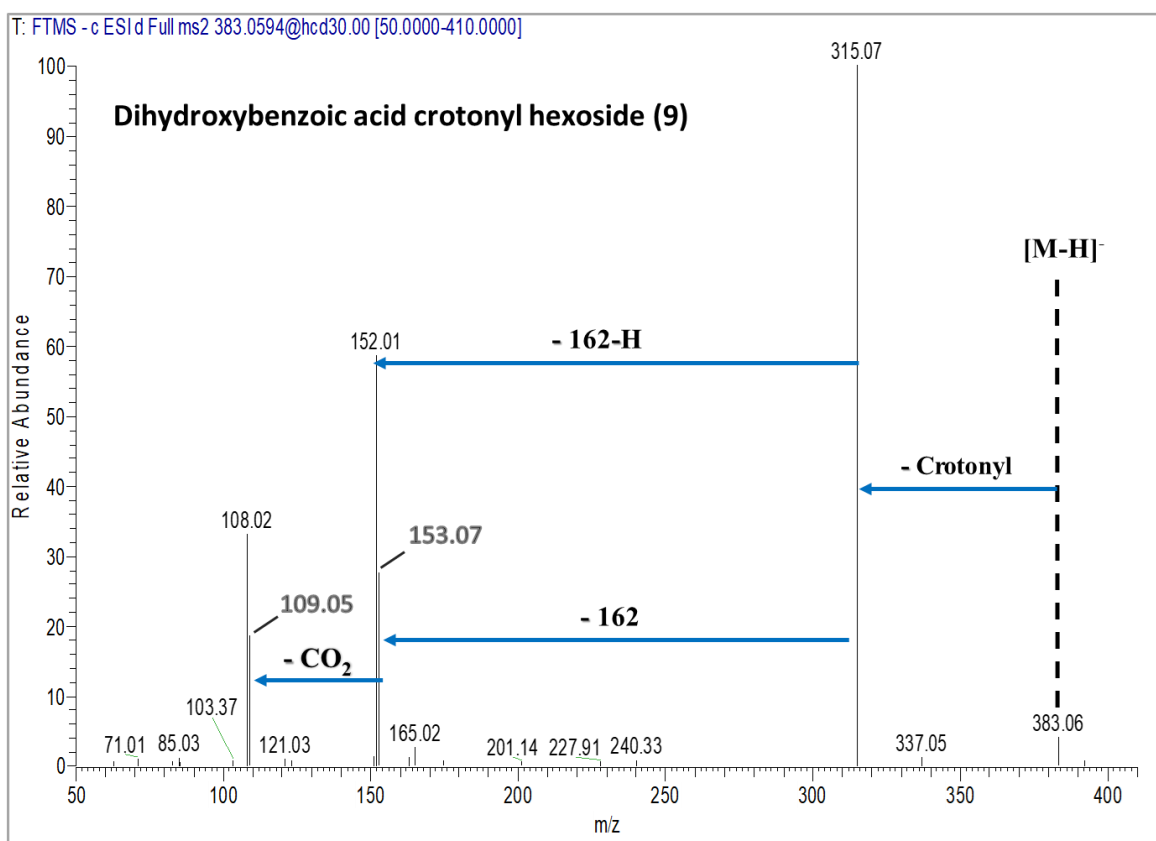

**Figure S4.** Proposed fragmentation pathway observed in MS/MS spectrum of dihydroxybenzoic acid crotonyl hexoside (**9**).

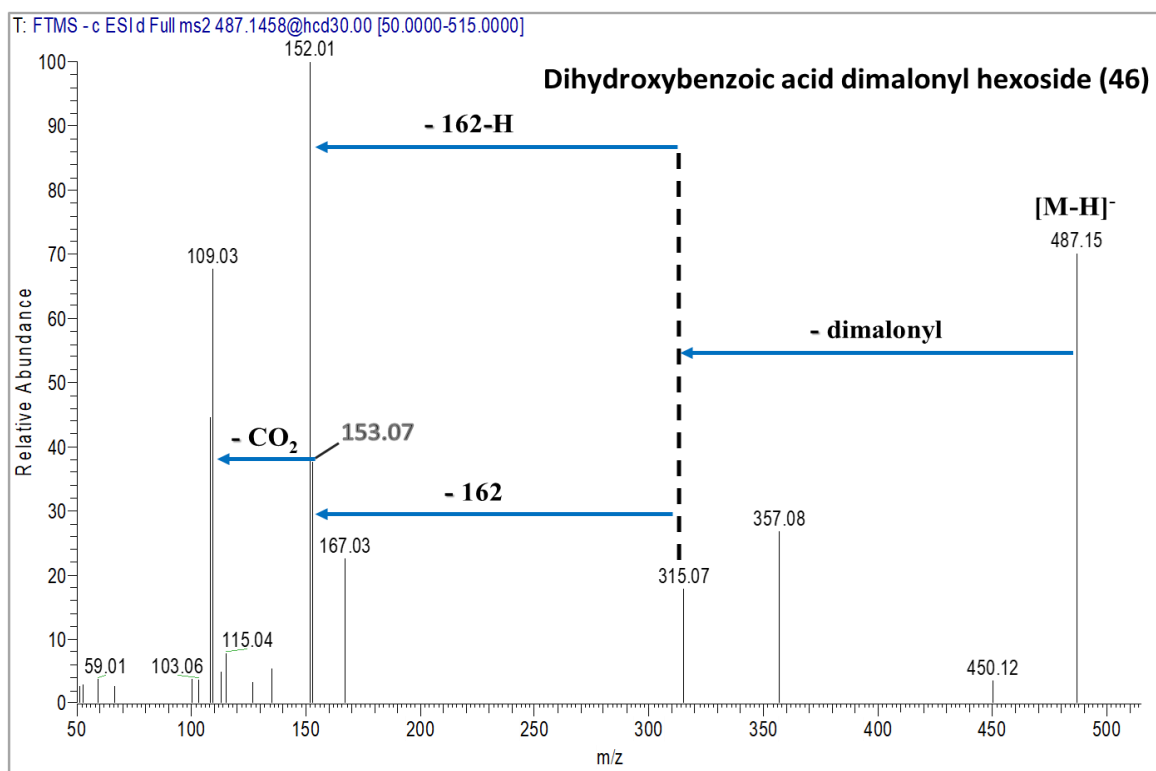

**Figure S5.** Proposed fragmentation pathway observed in MS/MS spectrum of dihydroxybenzoic acid dimalonyl hexoside (**46**).

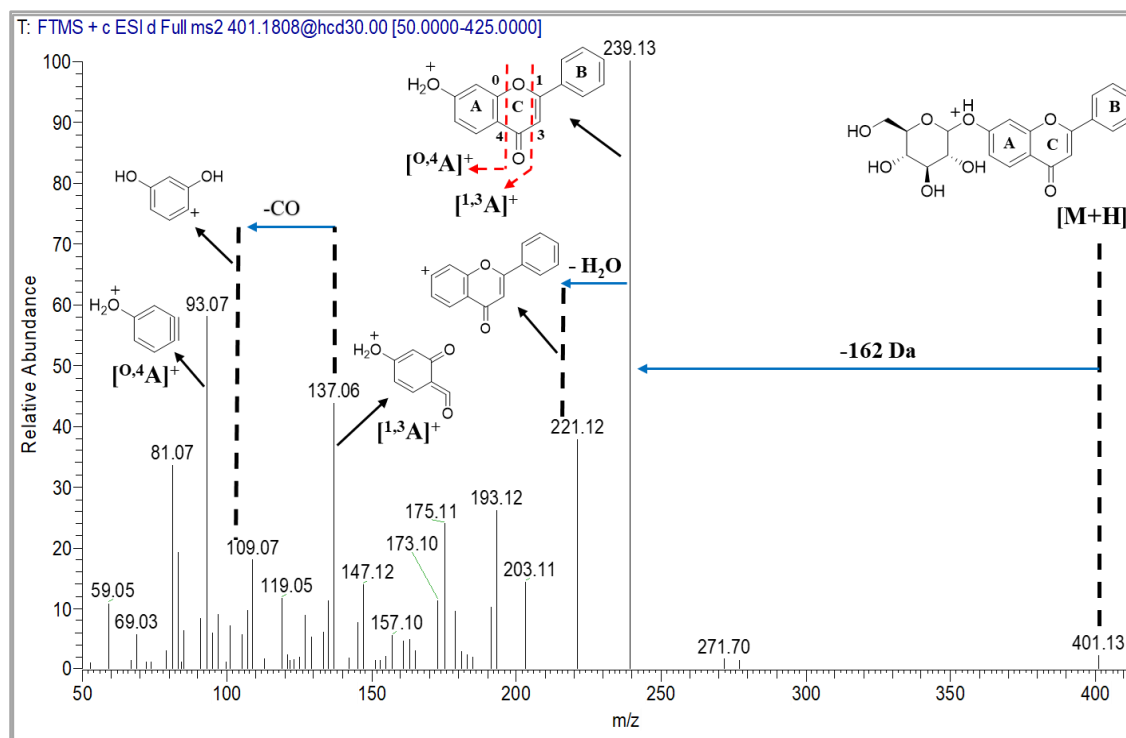

**Figure S6.** Proposed fragmentation pathway observed in MS/MS spectrum of 7-hydroxyflavone glucoside (**19**).

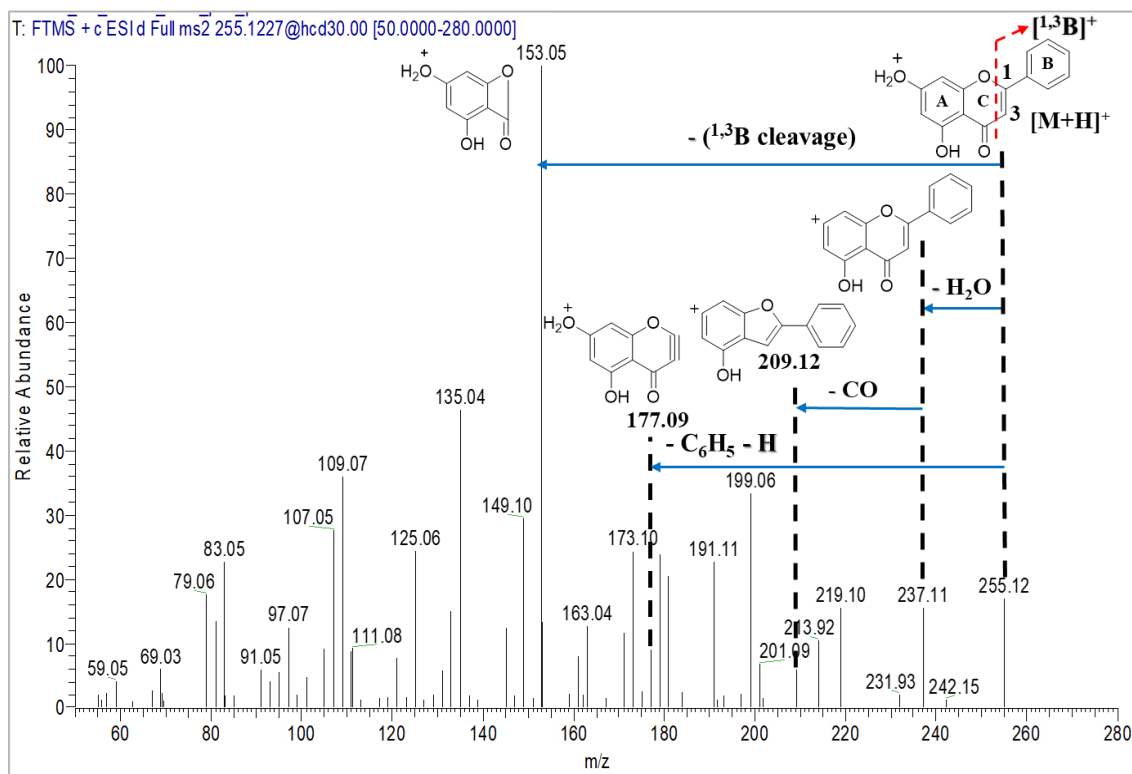

**Figure S7.** Proposed fragmentation pathway observed in MS/MS spectrum of 5,7-dihydroxyflavone, or known as chrysin (**20**).

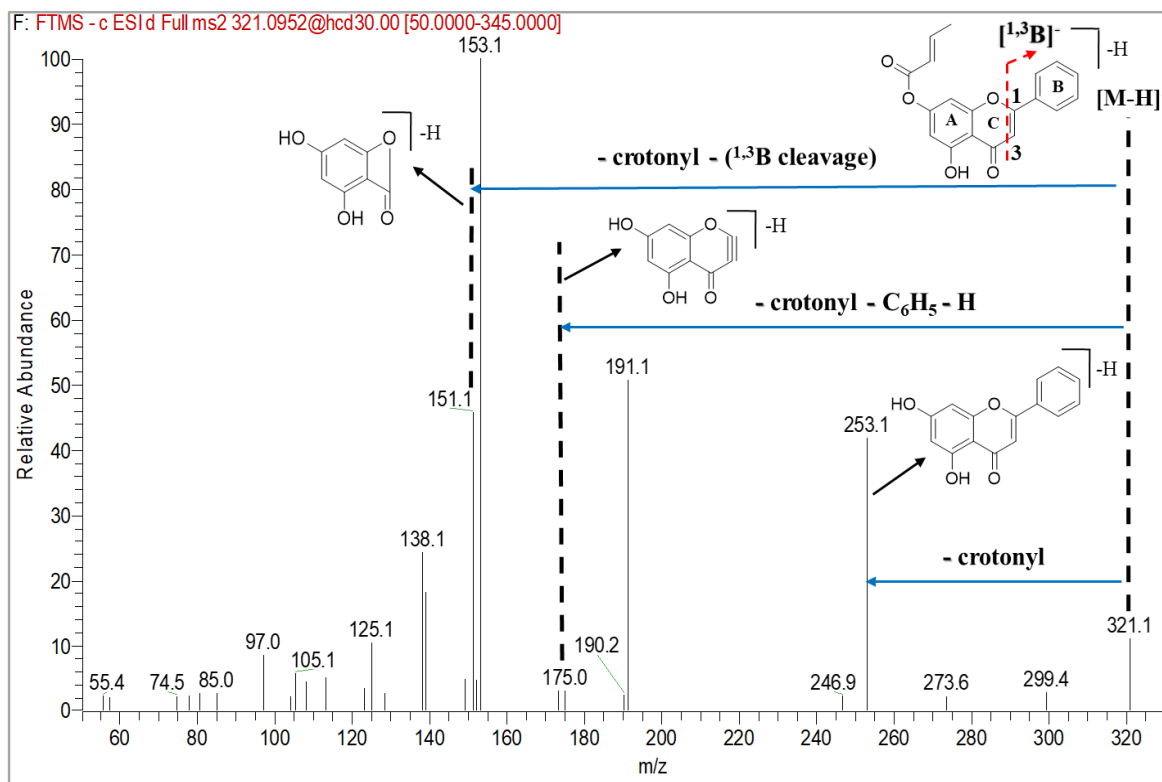

**Figure S8.** Proposed fragmentation pathway observed in MS/MS spectrum of 7-*O*-crotonylchrysin (**21**).

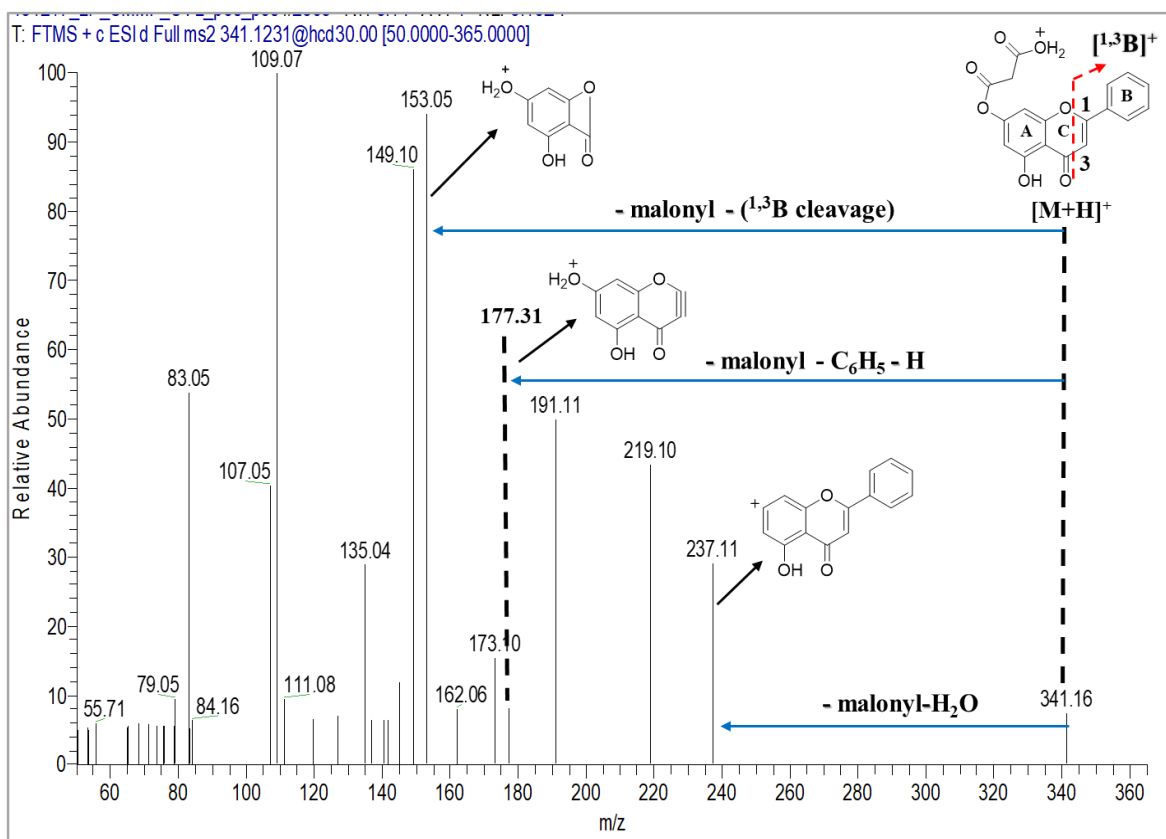

**Figure S9.** Proposed fragmentation pathway observed in MS/MS spectrum of 7-*O*-malonylchrysin (**25**).

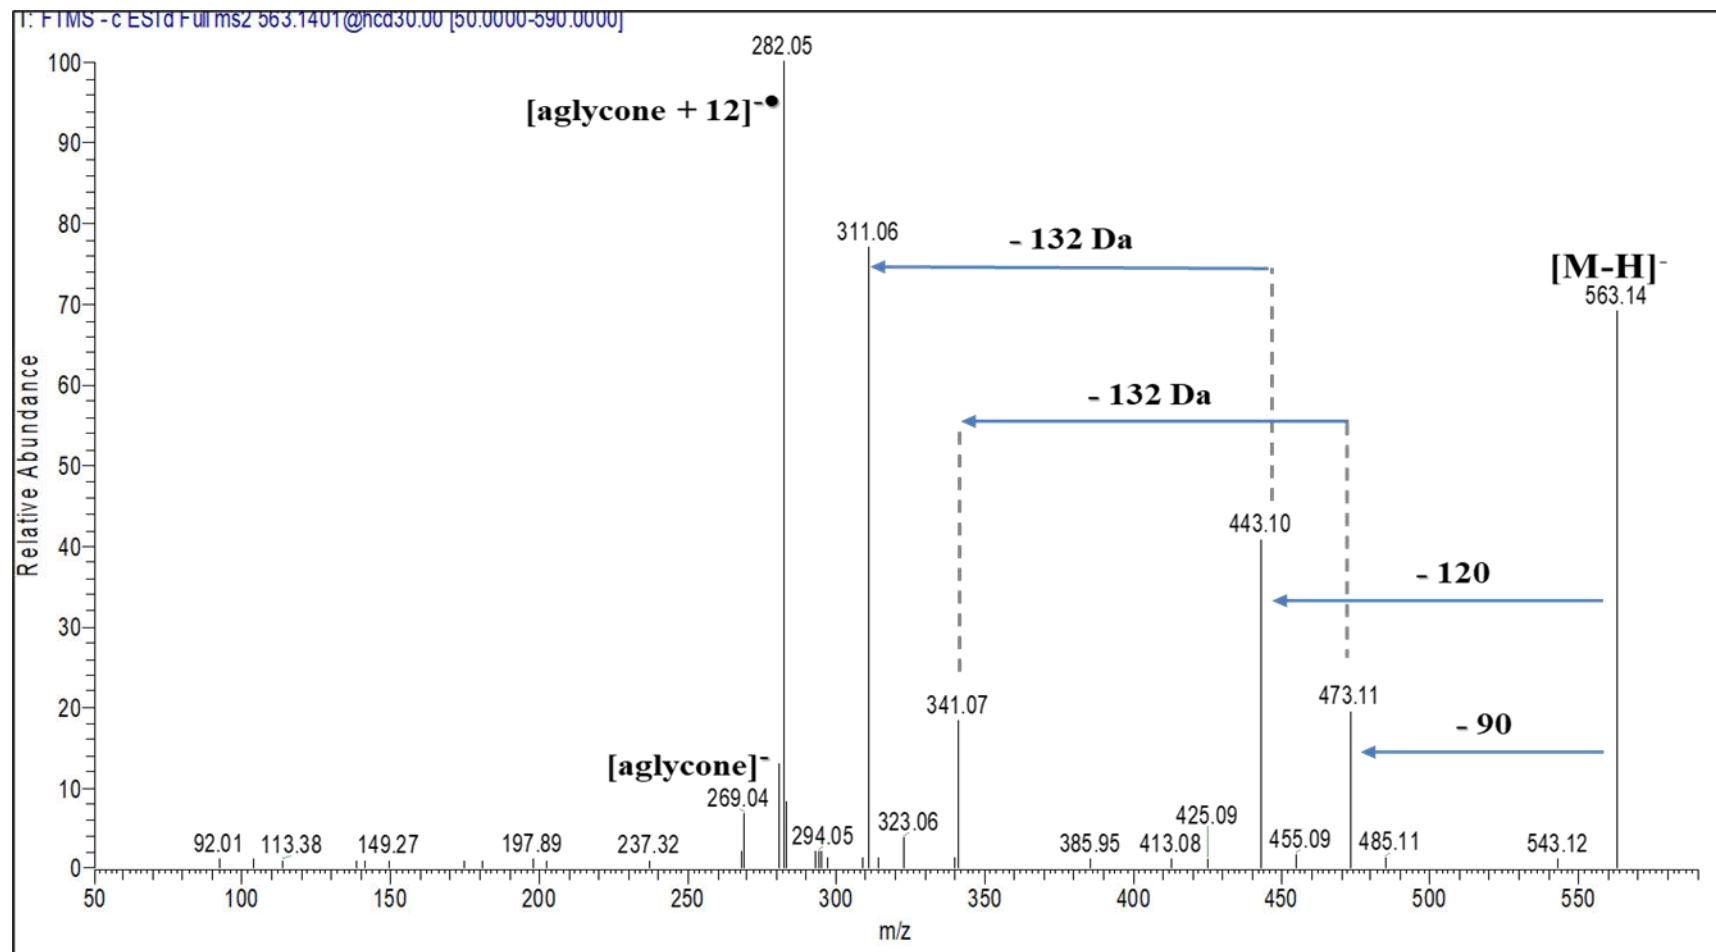

**Figure S10.** Proposed fragmentation pathway observed in MS/MS spectrum of apigenin-6-*C*- $\beta$ -glucoside 4'-*O*- $\alpha$ -apiofuranoside (**28**).



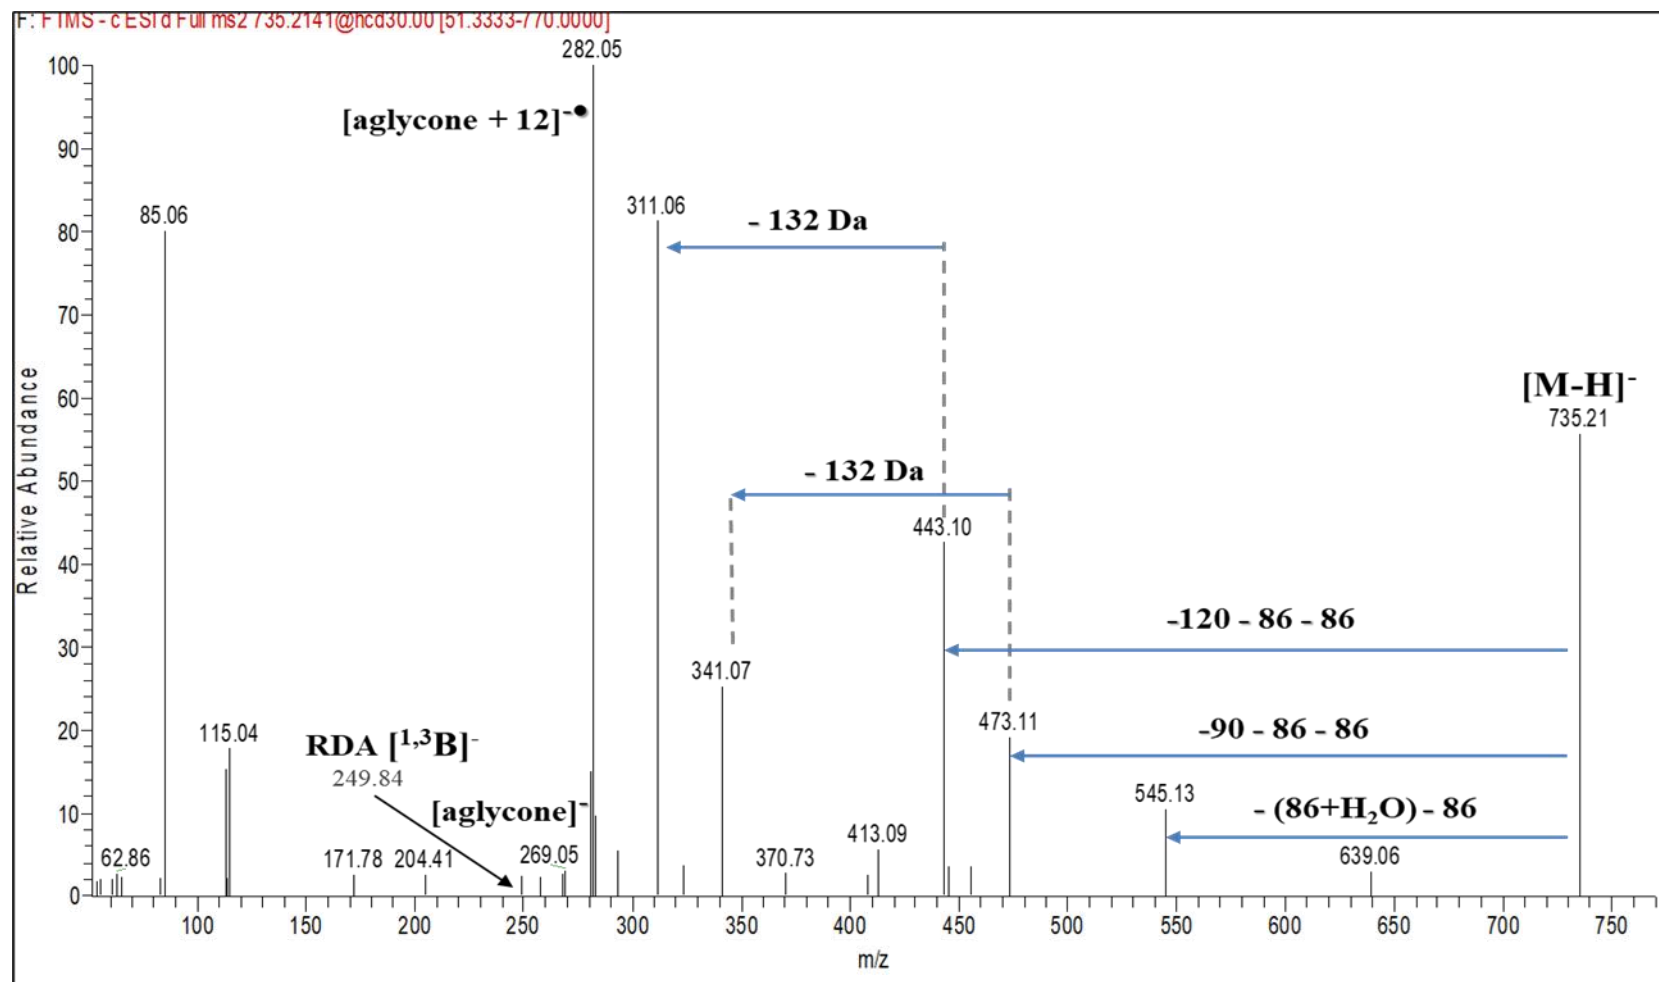

**Figure S11.** Proposed fragmentation pathway observed in MS/MS spectrum of apigenin-6-*C*- $\beta$ -[(4'',6''-*O*-dimalonyl)-glucoside] 4'-*O*- $\alpha$ -apiofuranoside (**47**).

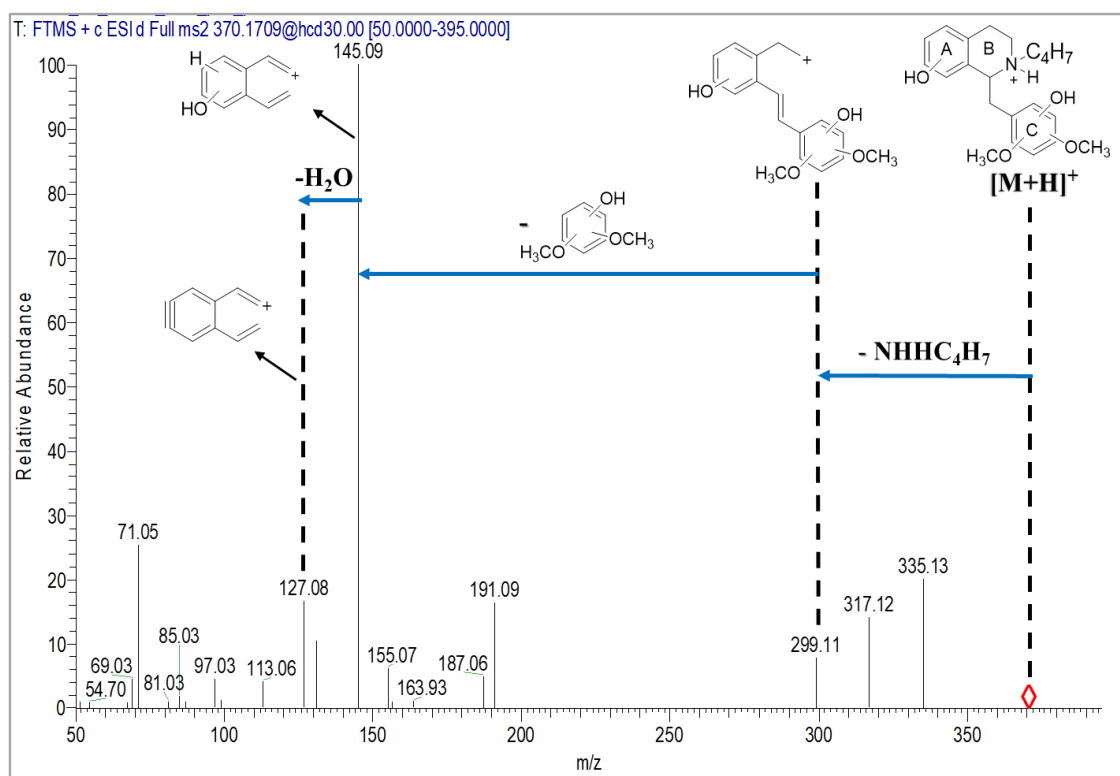

**Figure S12.** Proposed fragmentation pathway observed in MS/MS spectrum of benzyltetrahydroisoquinoline derivative (**23**).

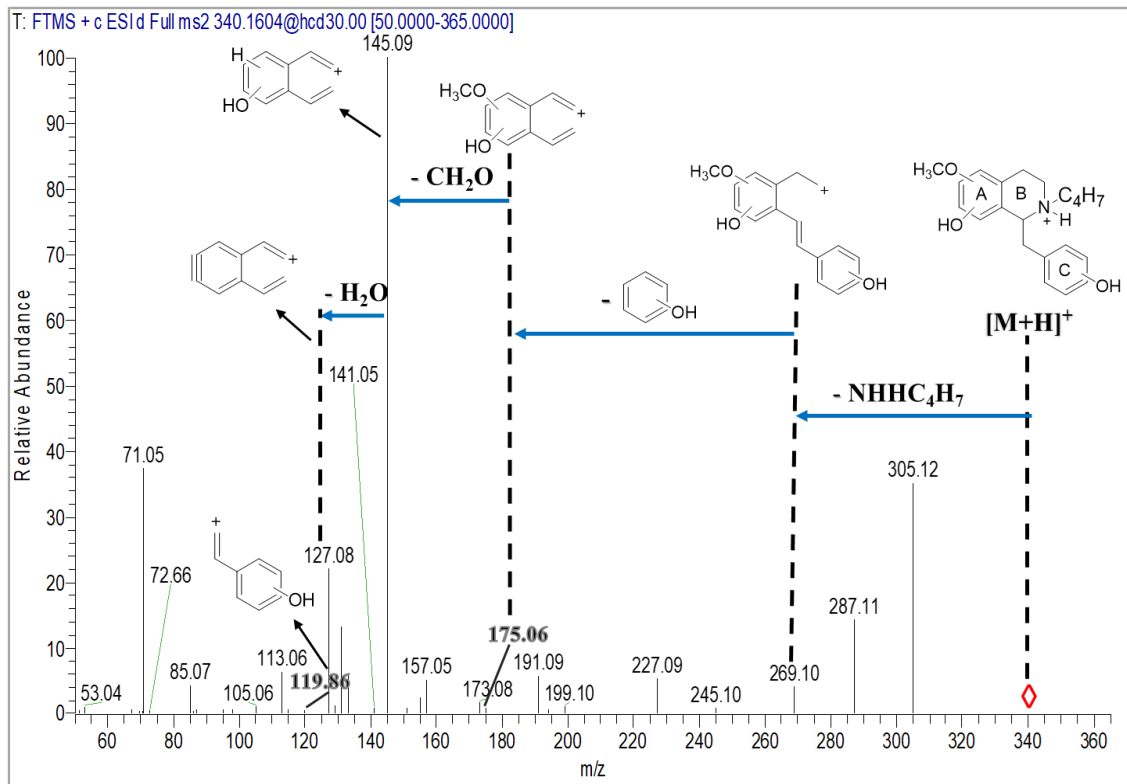

**Figure S13.** Proposed fragmentation pathway observed in MS/MS spectrum of benzyltetrahydroisoquinoline derivative (**29**).

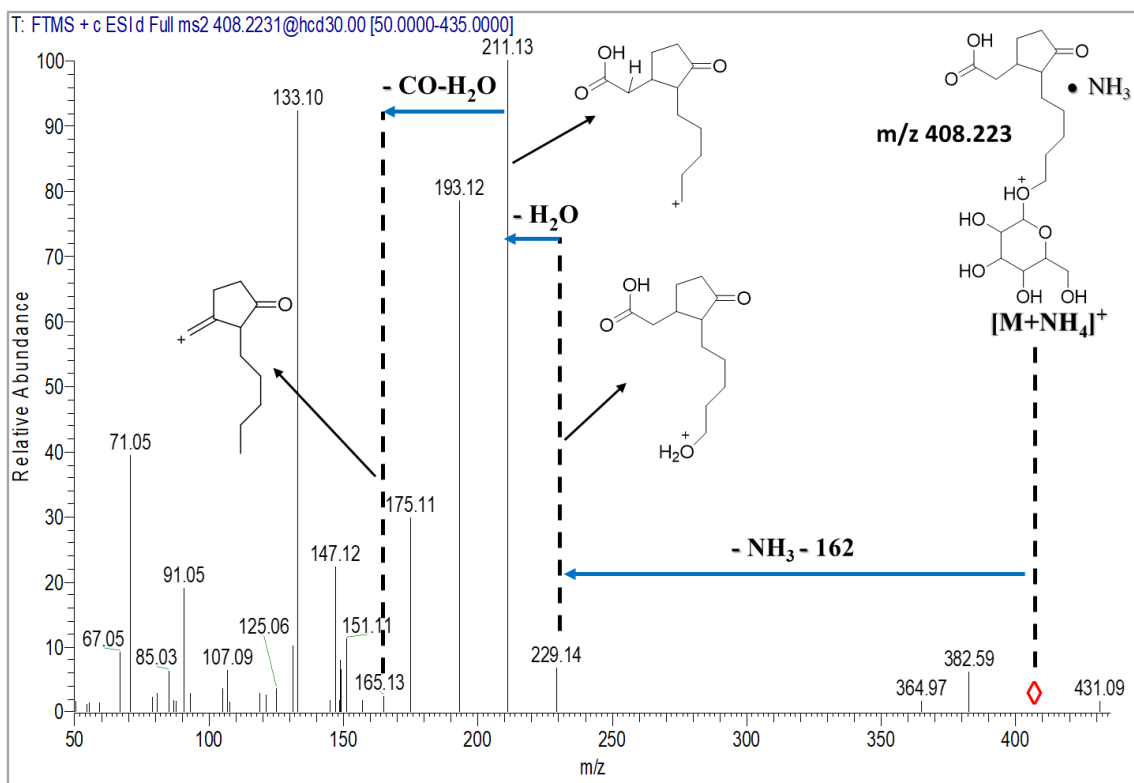

**Figure S14.** Proposed fragmentation pathway observed in MS/MS spectrum of hydrogenated derivative of tuberonic acid hexoside (**26**).

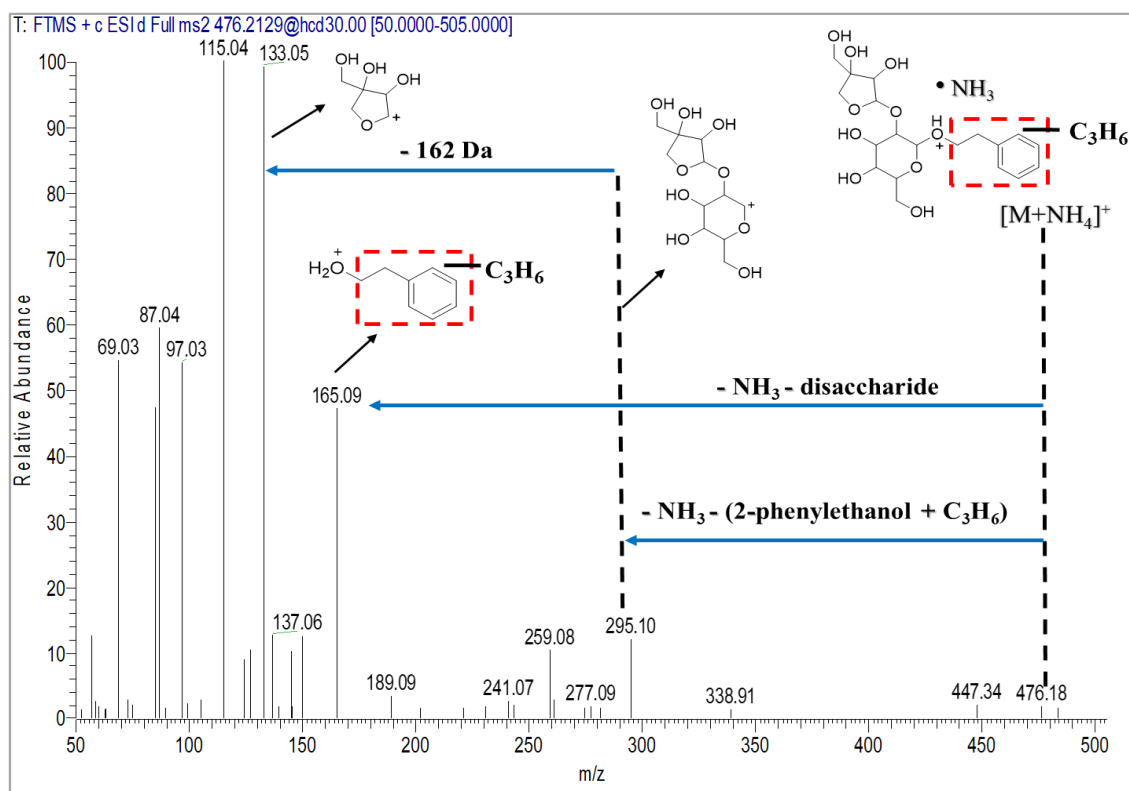

**Figure S15.** Proposed fragmentation pathway observed in MS/MS spectrum of isopropyl derivative of phenethyl-1-*O*- $\beta$ -D-apiofuranosyl (1 $\rightarrow$ 2)- $\beta$ -D-glucopyranoside

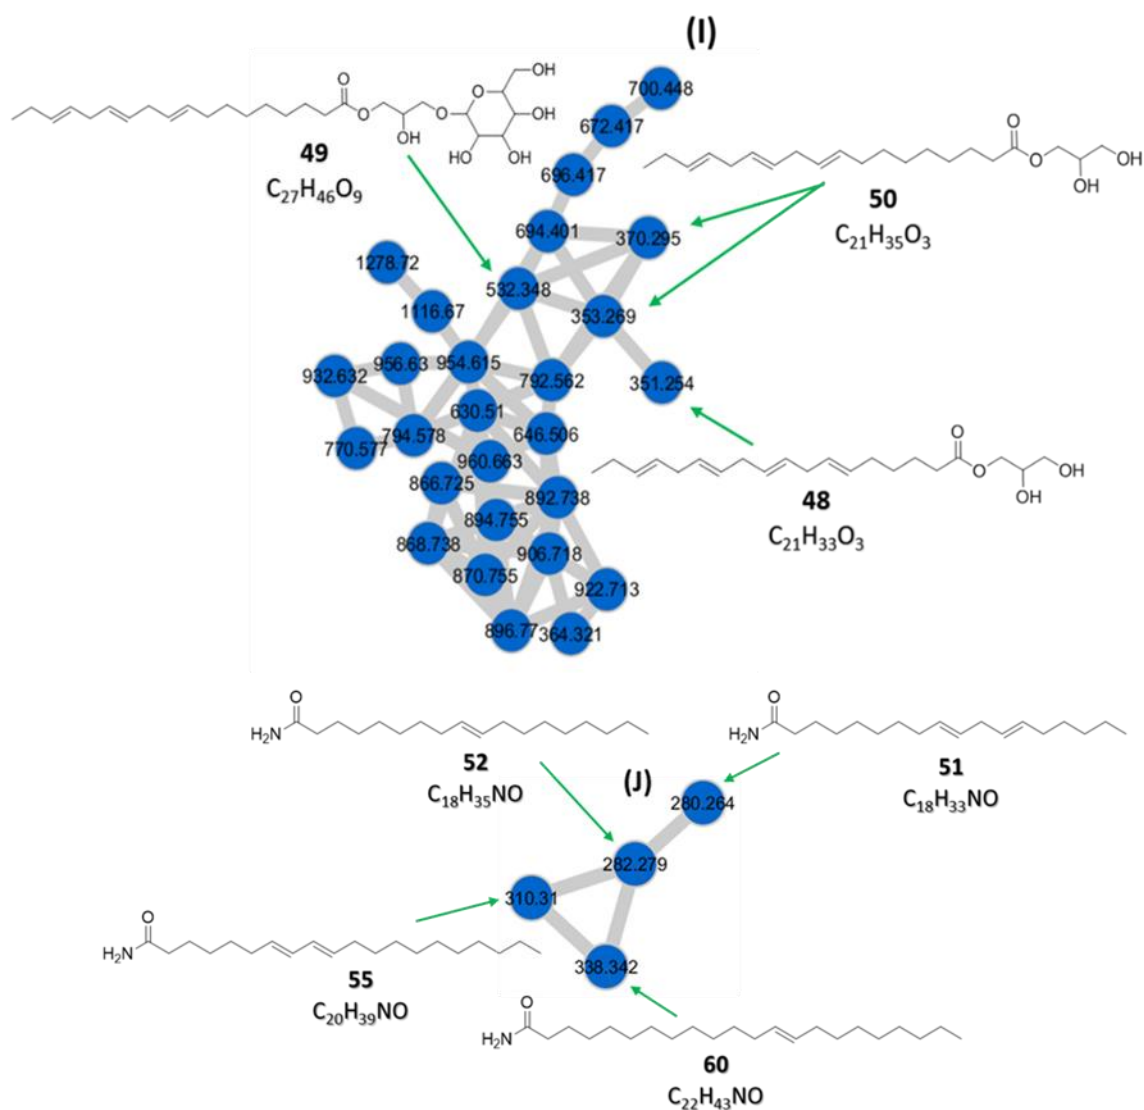

**Figure S16.** Molecular families of monoacylglycerols (cluster I: positive ion) and fatty acid amides (clusters J: positive ion), extracted from the full MN of *Christia vespertilionis* leaf.

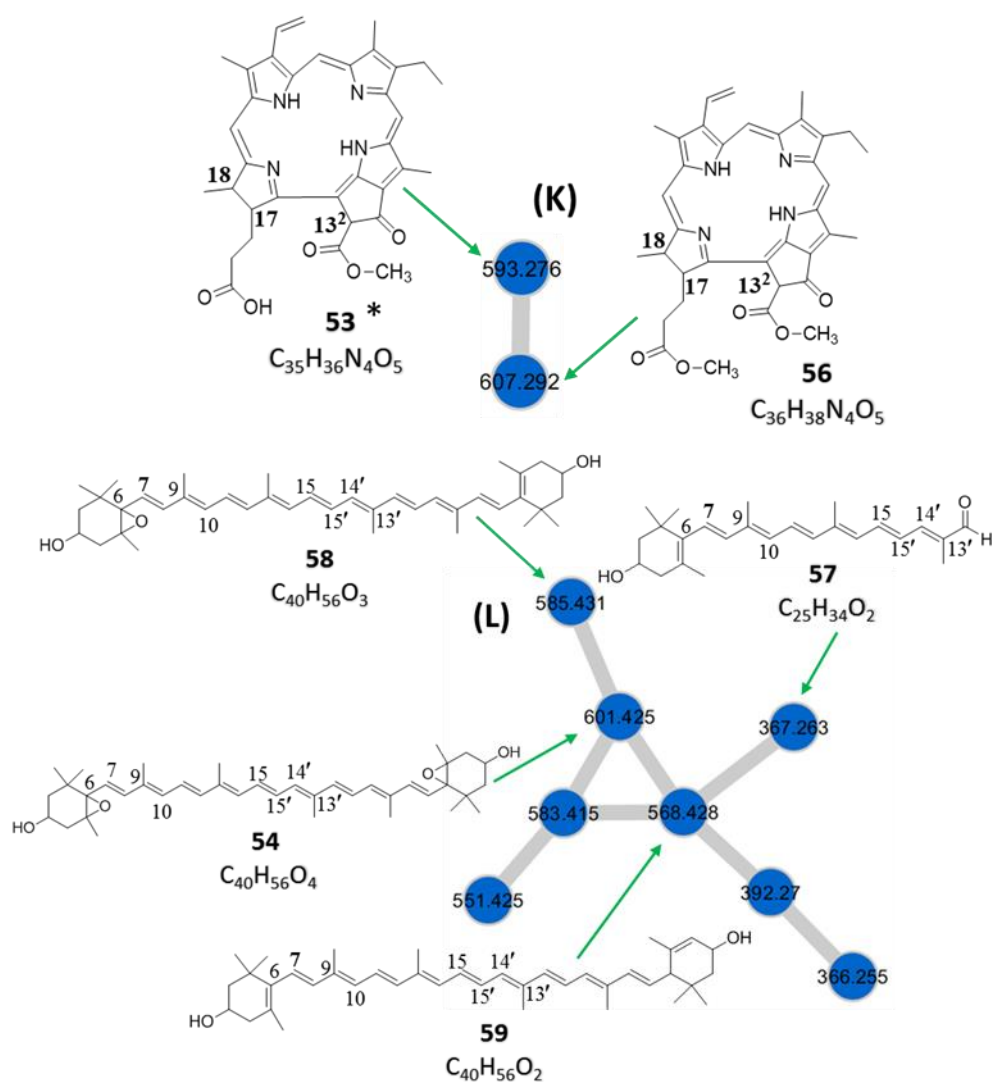

**Figure S17.** Molecular families of chlorophyll derivatives (cluster K: positive ion) and carotenoids (cluster L: positive ion), extracted from the full MN of *Christia vespertilionis* leaf.  
 \* Compound previously reported in *Christia vespertilionis*.

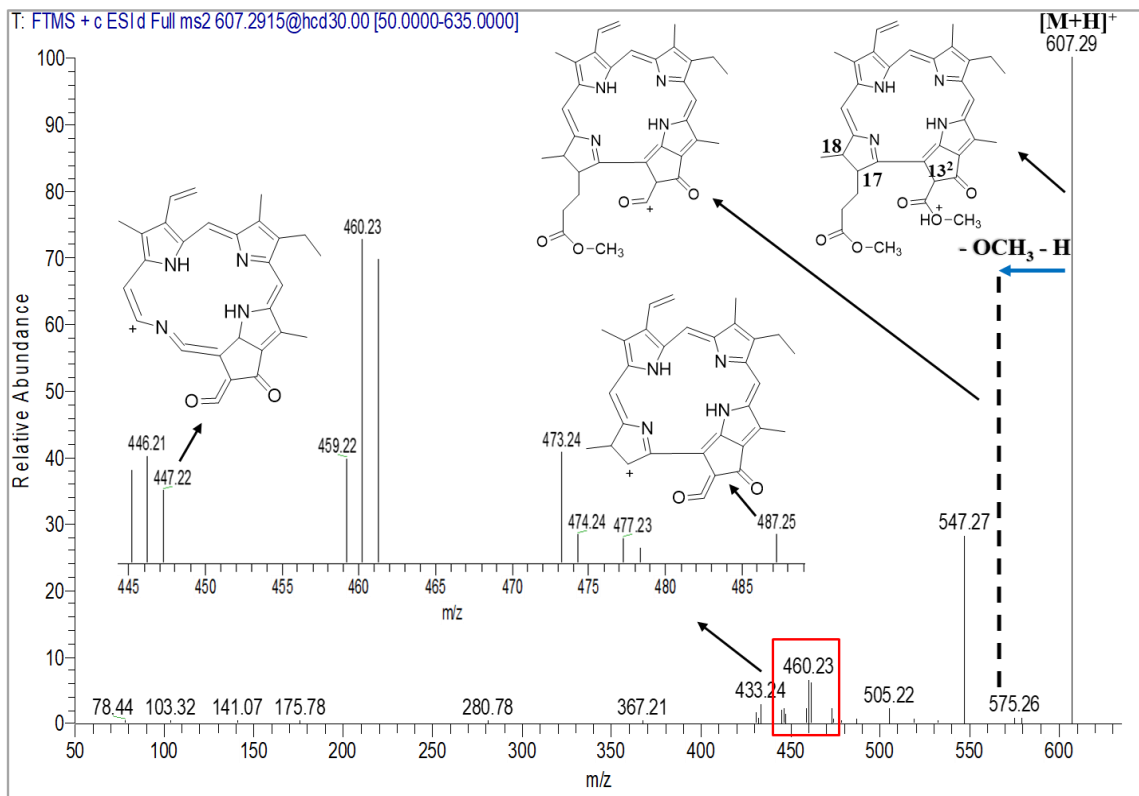

**Figure S18.** MS/MS spectrum of pheophorbide-a methyl ester (**56**).

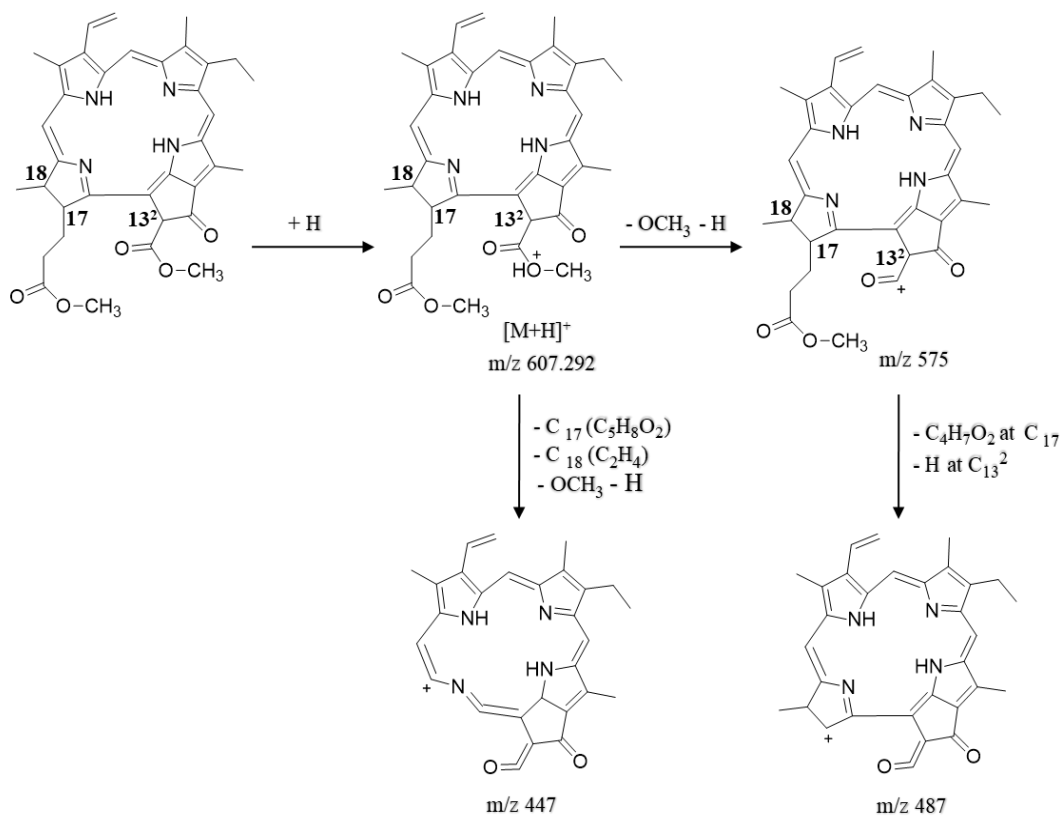

**Figure S19.** Proposed fragmentation pathway observed in MS/MS spectrum of pheophorbide-a methyl ester (**56**).

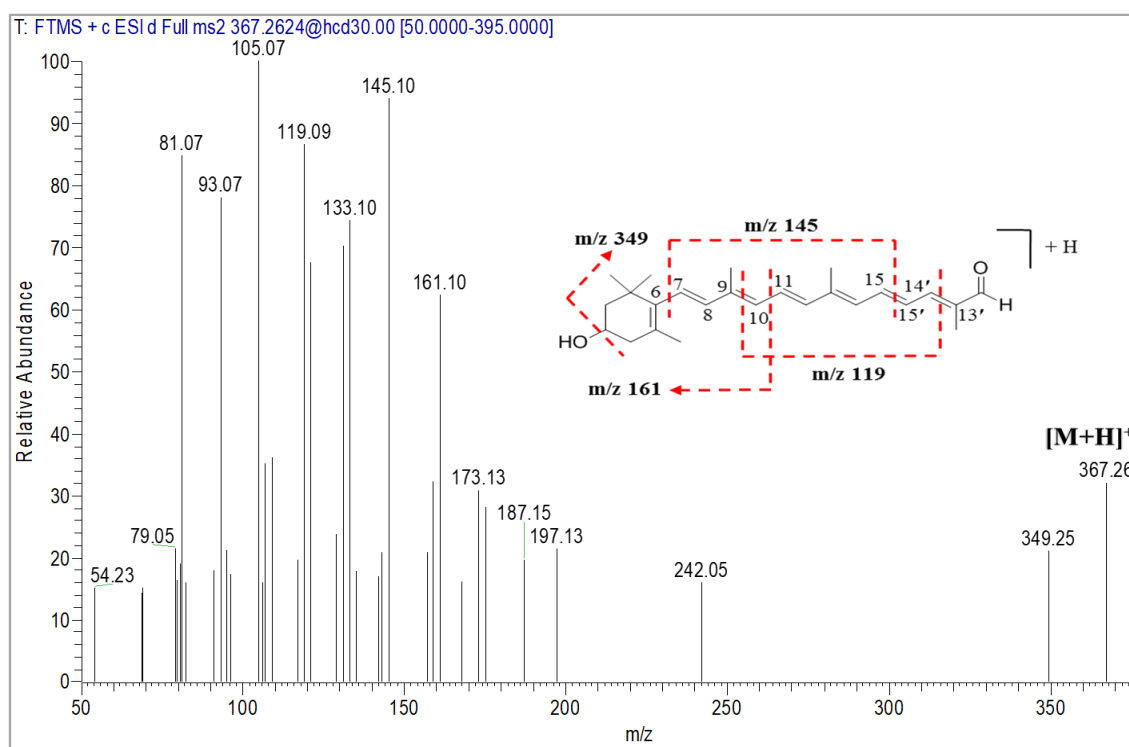

**Figure S20.** Major fragment ions from the fragmentation of  $\beta$ -apo-12'-luteinal (57).

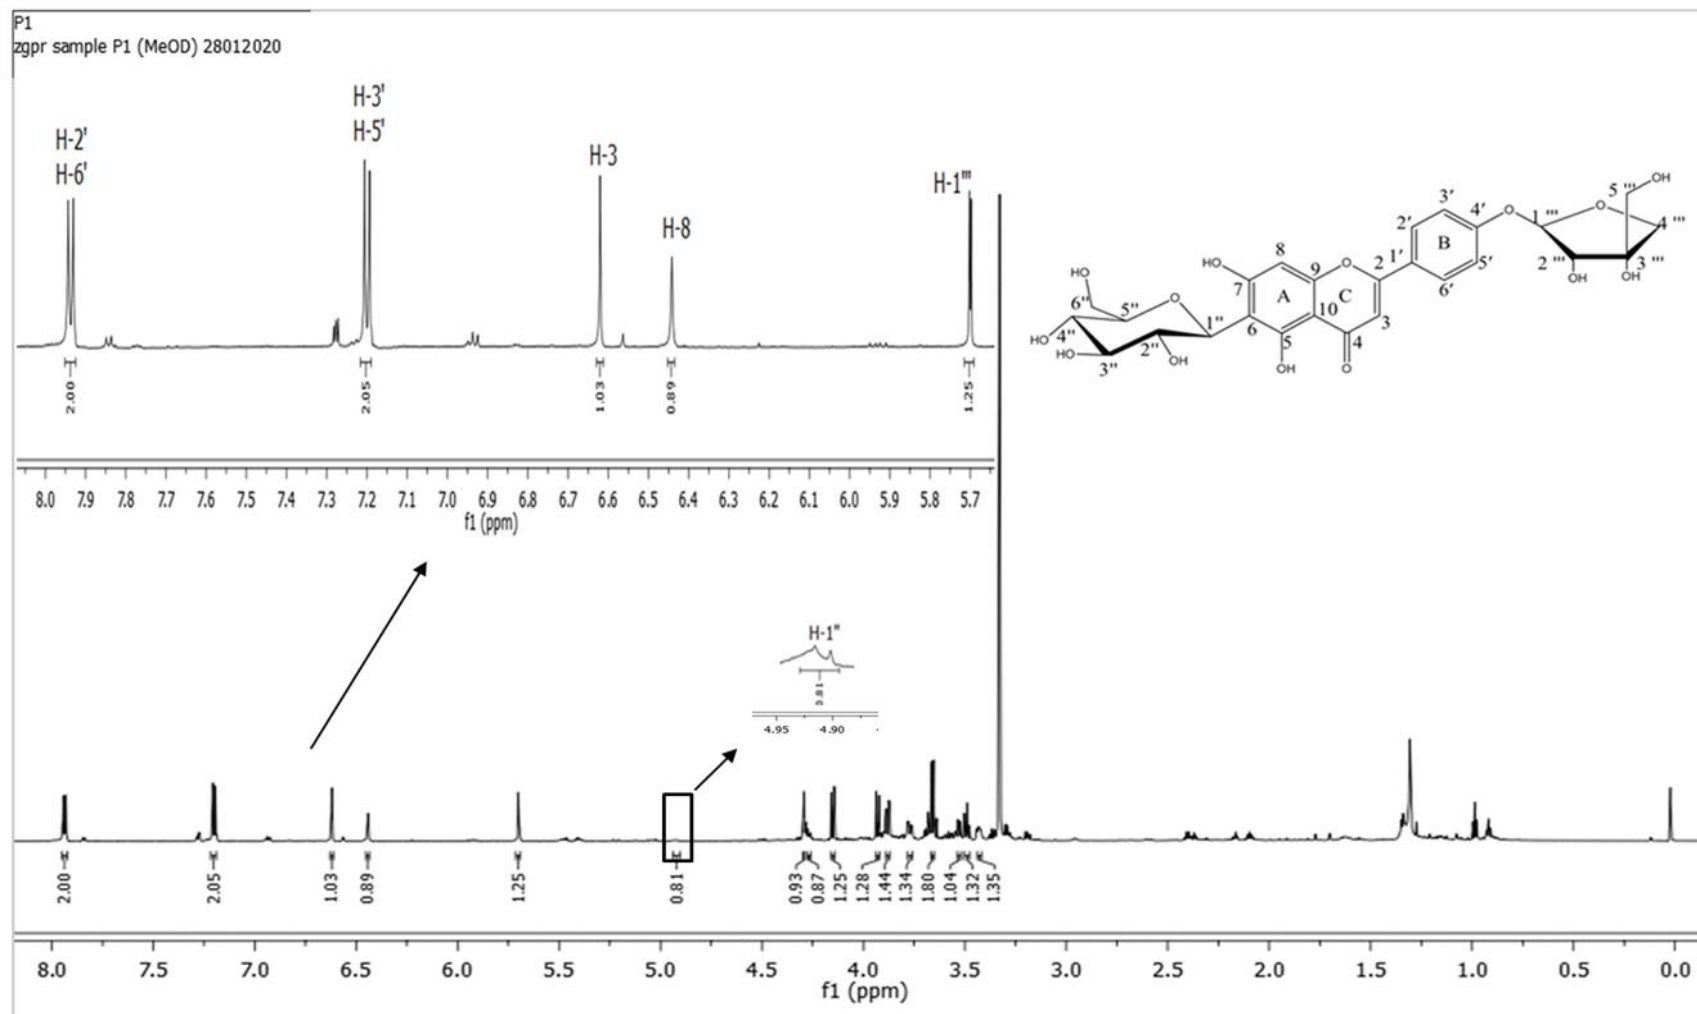

**Figure S21.**  $^1\text{H}$ -NMR spectrum of apigenin-6-C- $\beta$ -glucoside 4'-O- $\alpha$ -apiofuranoside (**28**) (700 MHz, in  $\text{CD}_3\text{OD}$ ).



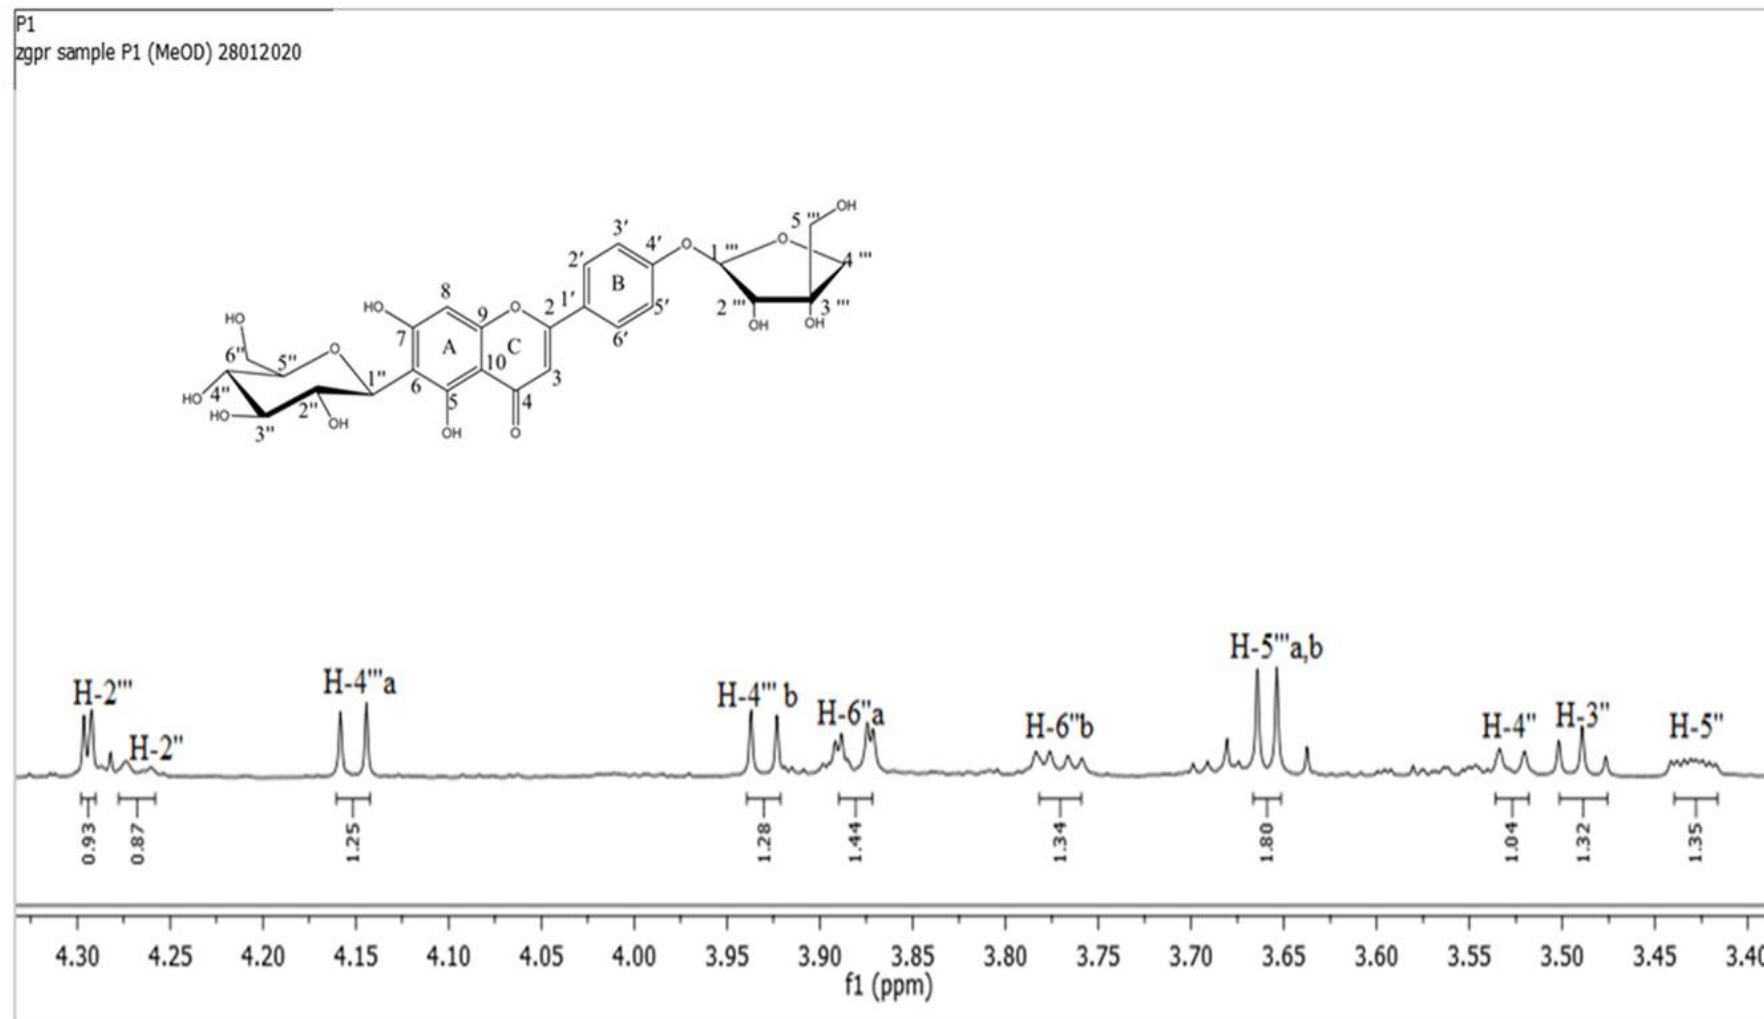

**Figure S22.** Expanded  $^1\text{H}$ -NMR spectrum of sugar signals in apigenin-6-C- $\beta$ -glucoside 4'-O- $\alpha$ -apiofuranoside (28) (700 MHz, in  $\text{CD}_3\text{OD}$ ).

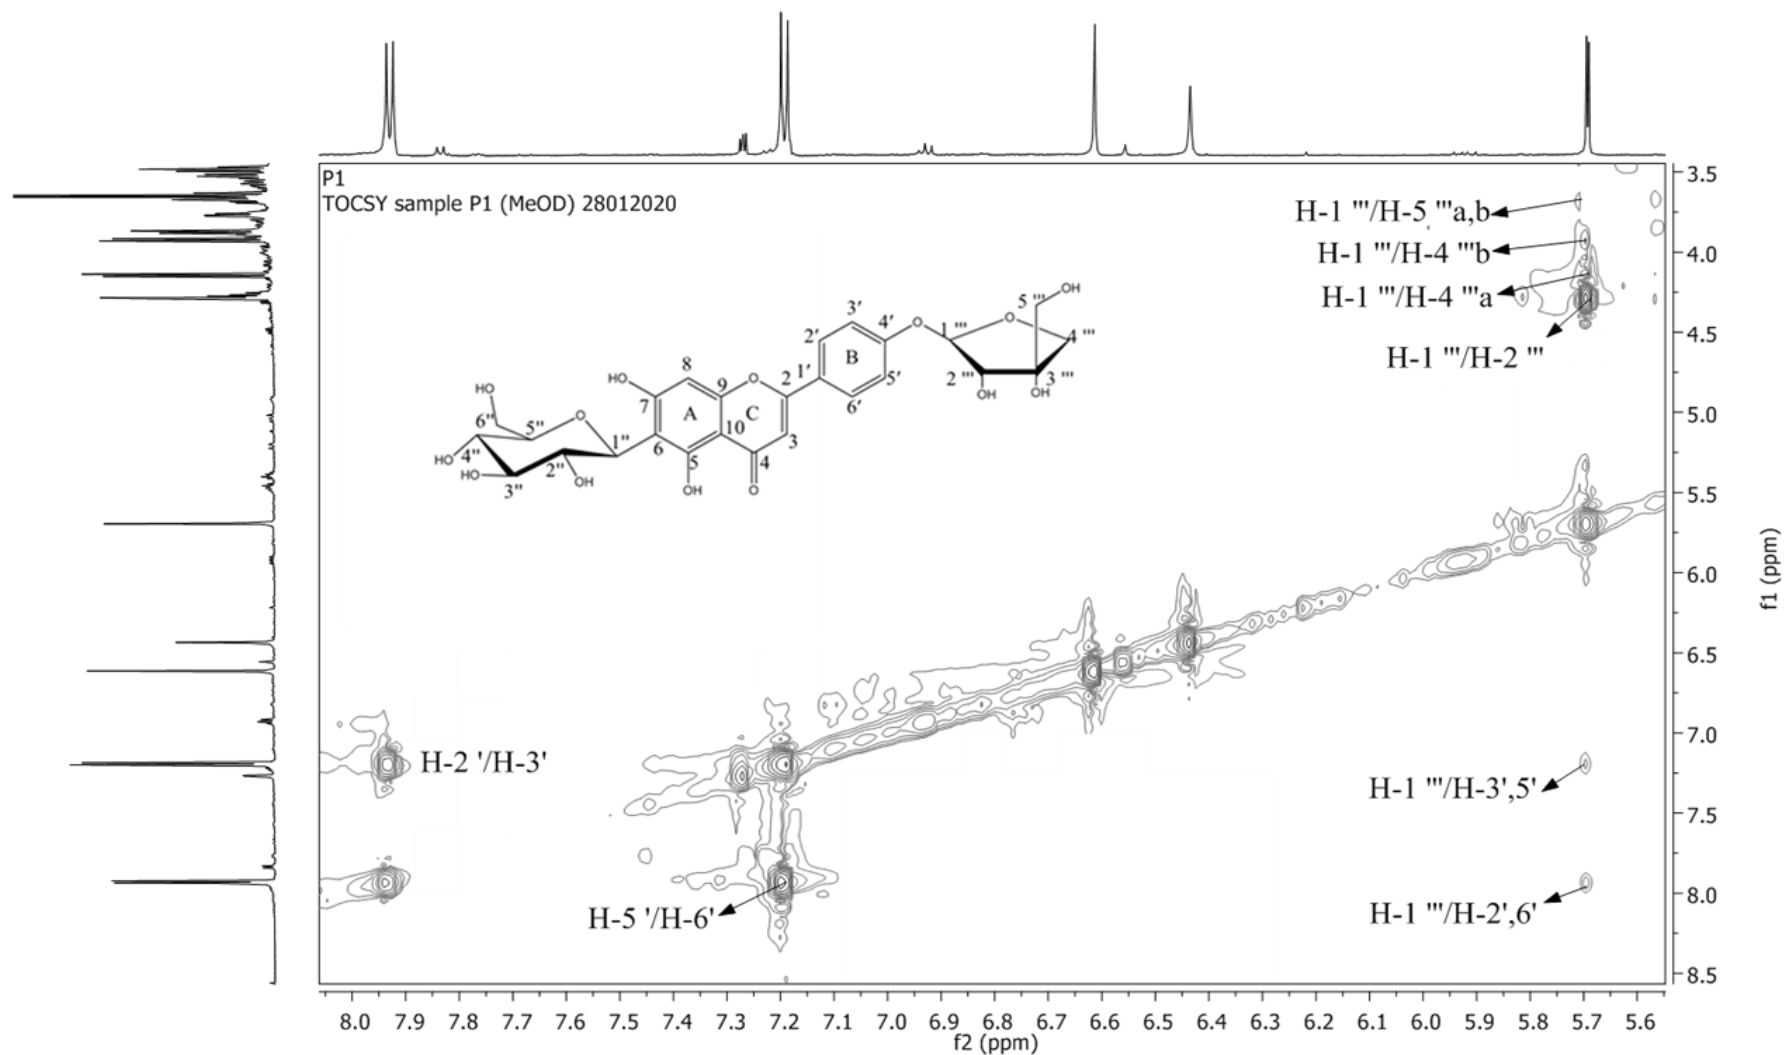

**Figure S23.** Expanded TOCSY spectrum of apigenin-6-C- $\beta$ -glucoside 4'-O- $\alpha$ -apiofuranoside (**28**) (700 MHz, in CD<sub>3</sub>OD).

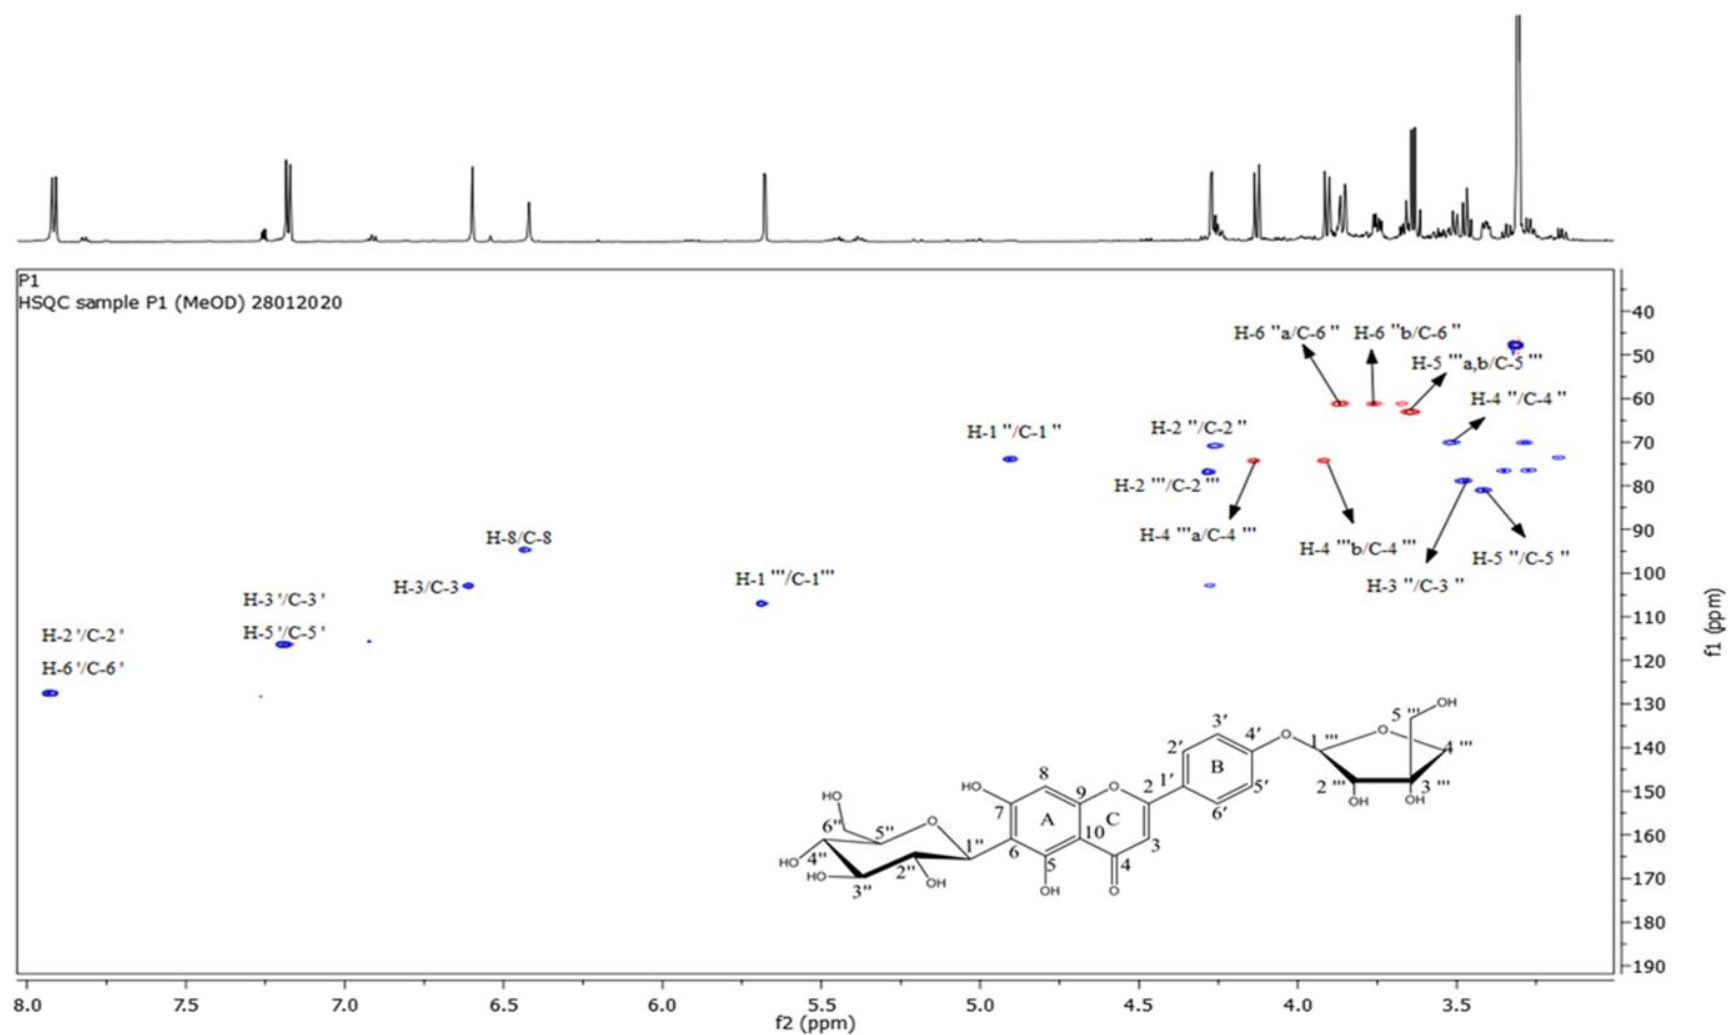

**Figure S24.** HSQC spectrum of apigenin-6-*C*-β-glucoside 4'-*O*-α-apiofuranoside (**28**) (700 MHz, in CD<sub>3</sub>OD).

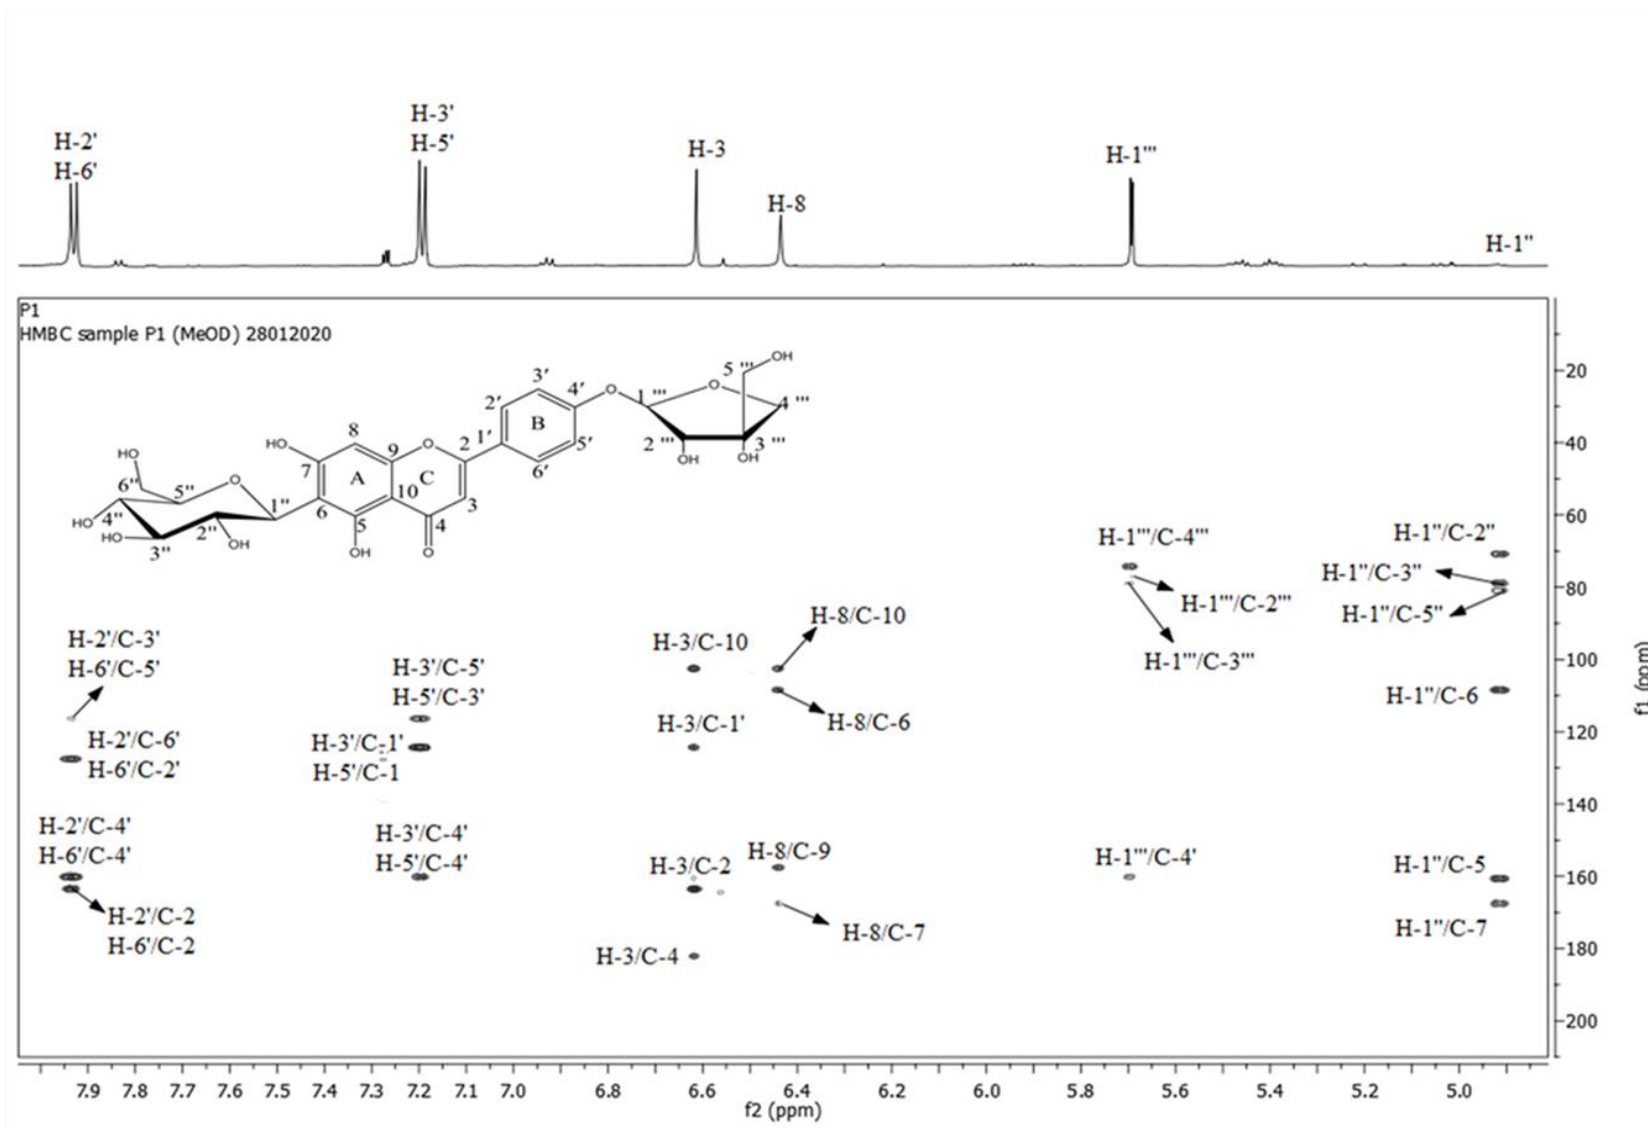

**Figure S25.** Expanded HMBC spectrum of apigenin-6-C- $\beta$ -glucoside 4'-O- $\alpha$ -apiofuranoside (**28**) (700 MHz, in CD<sub>3</sub>OD).

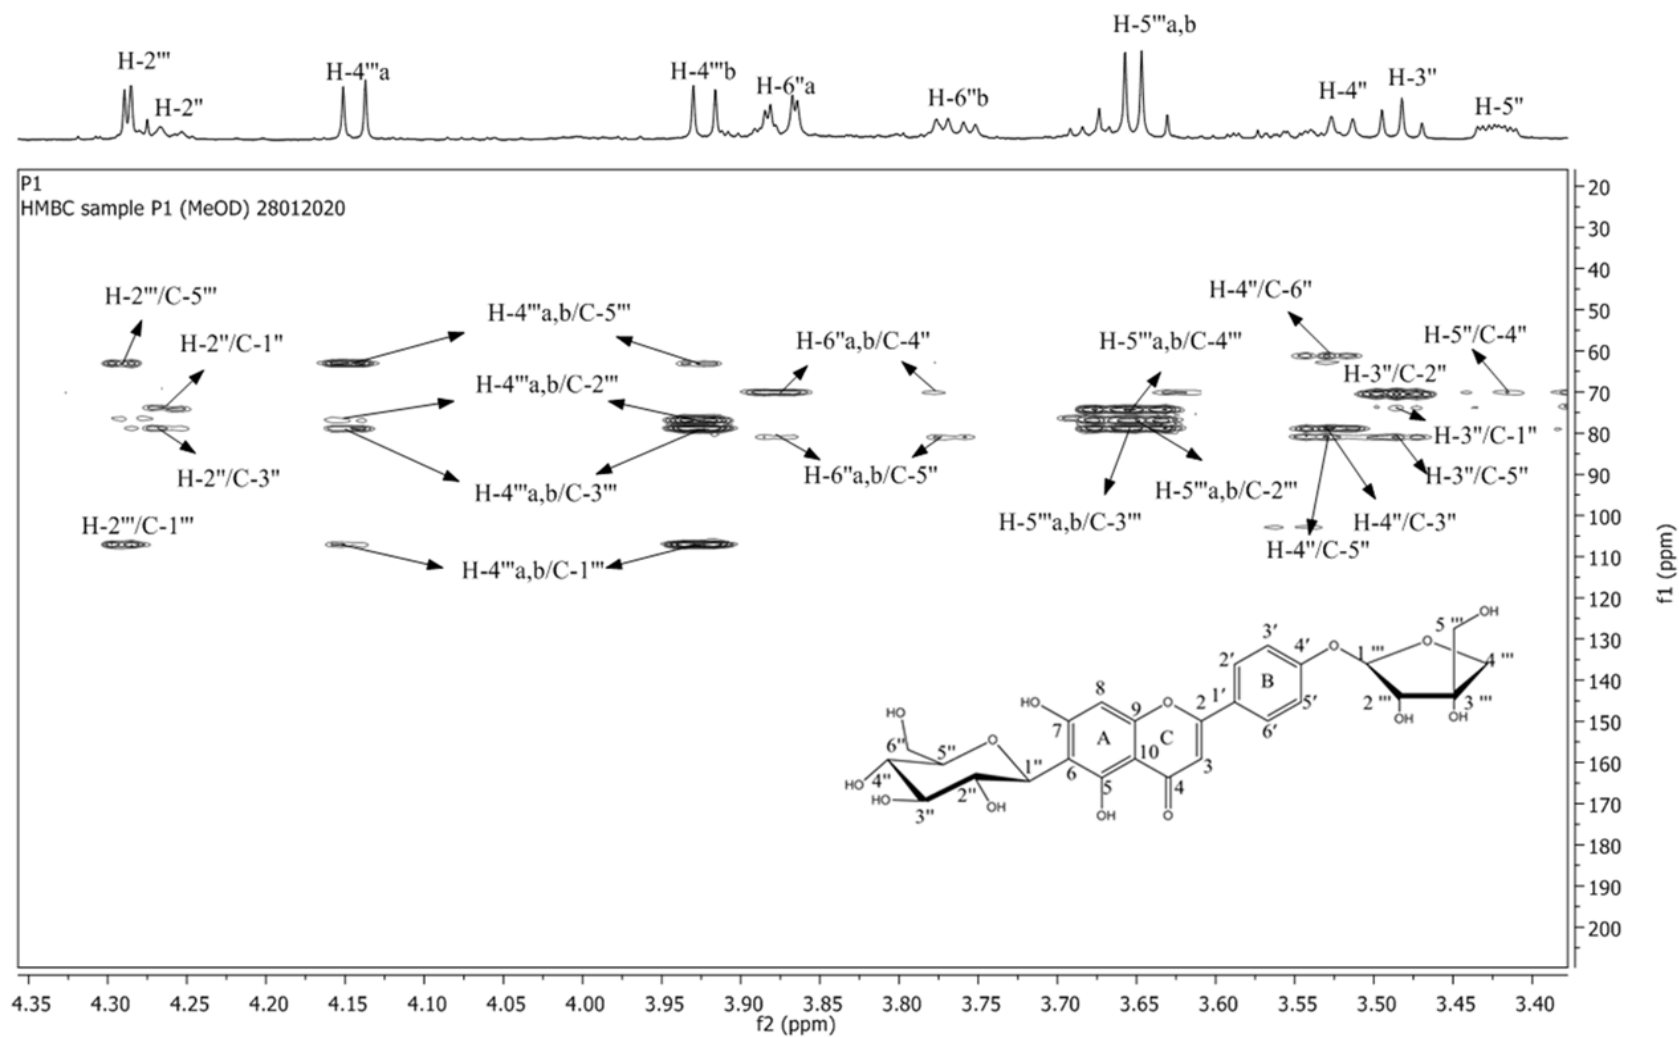

**Figure S26.** Expanded HMBC spectrum of apigenin-6-C-β-glucoside 4'-O-α-apiofuranoside (**28**) (700 MHz, in CD<sub>3</sub>OD).

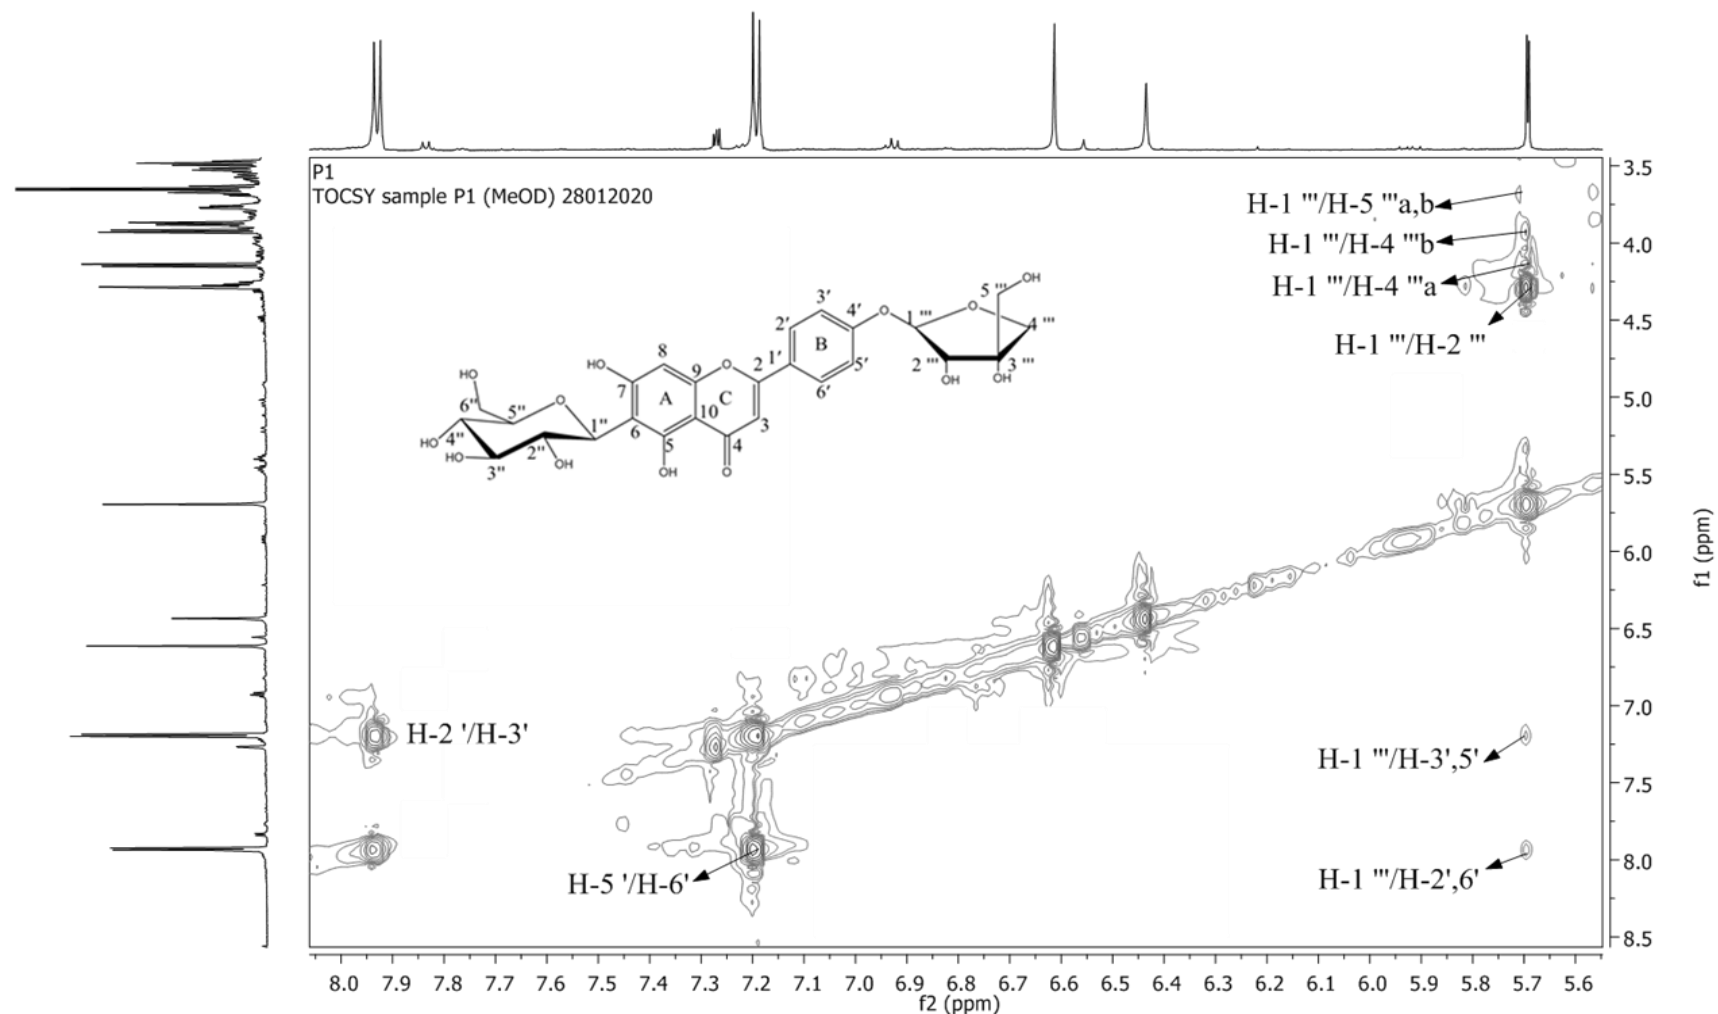

**Figure S27.** Expanded TOCSY spectrum of apigenin-6-C- $\beta$ -glucoside 4'-O- $\alpha$ -apiofuranoside (**28**) (700 MHz, in CD<sub>3</sub>OD).

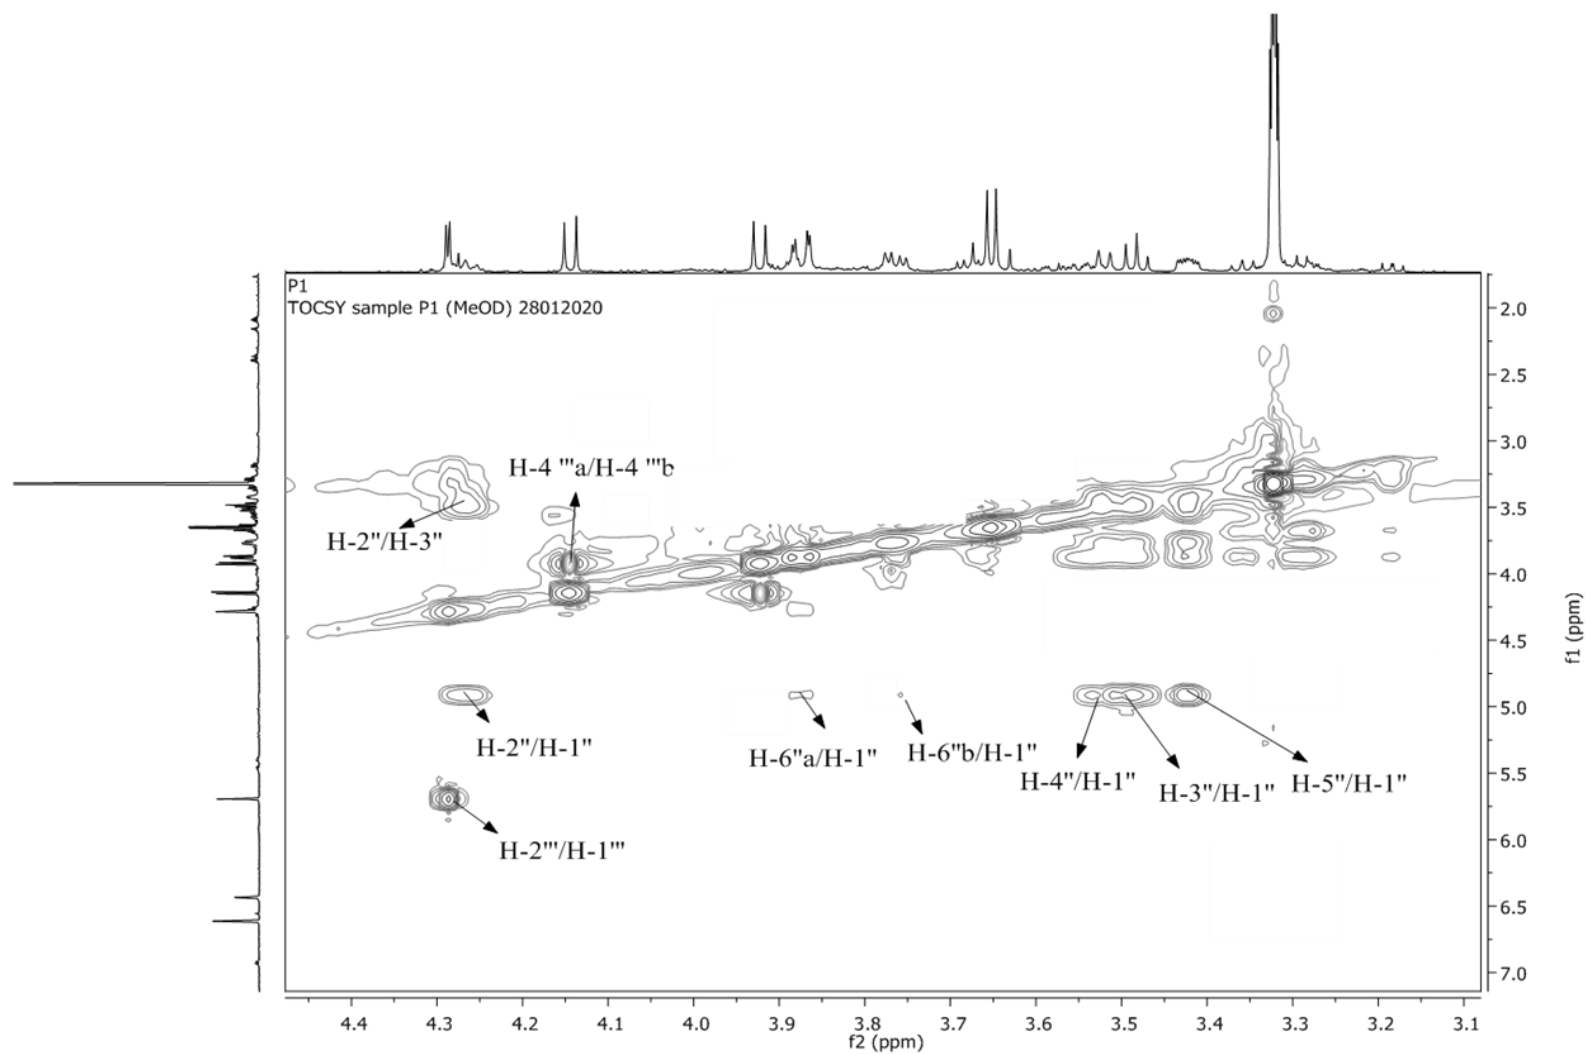

**Figure S28.** Expanded TOCSY spectrum of apigenin-6-*C*- $\beta$ -glucoside 4'-*O*- $\alpha$ -apiofuranoside (**28**) (700 MHz, in CD<sub>3</sub>OD).

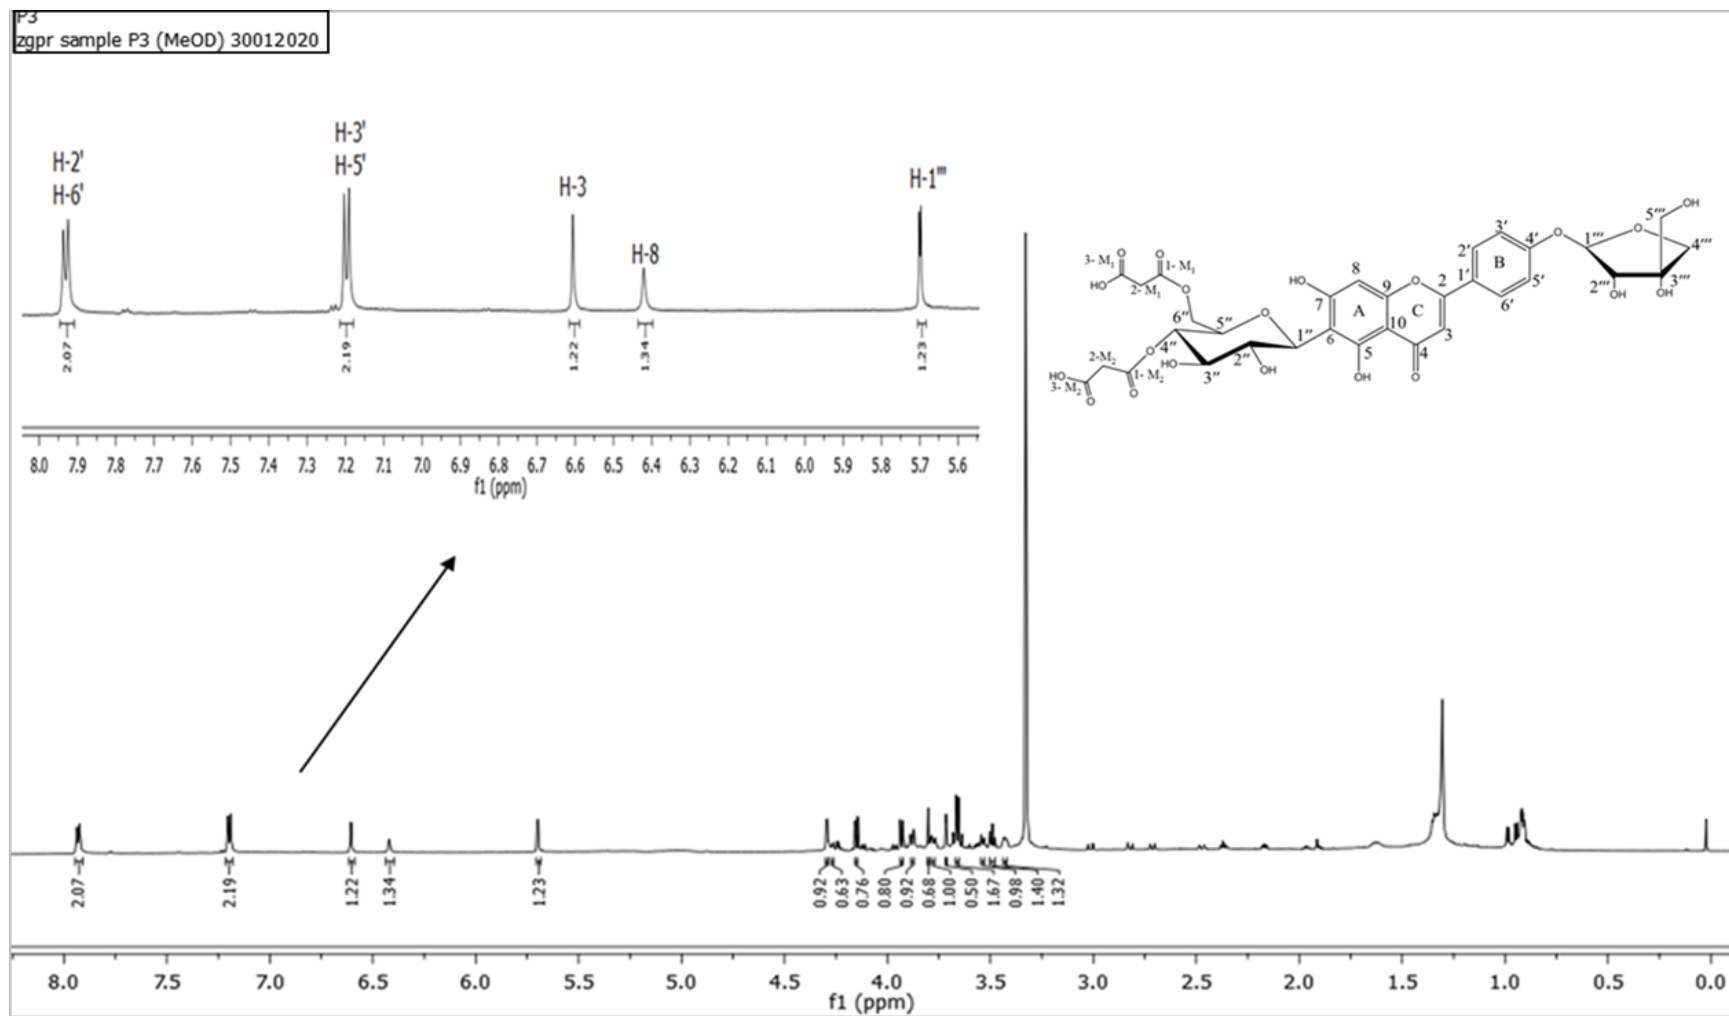

**Figure S29.**  $^1\text{H}$ -NMR spectrum of apigenin-6- $C$ - $\beta$ -[(4'',6''- $O$ -dimalonyl)-glucoside] 4'- $O$ - $\alpha$ -apiofuranoside (**47**) (700 MHz, in  $\text{CD}_3\text{OD}$ ).



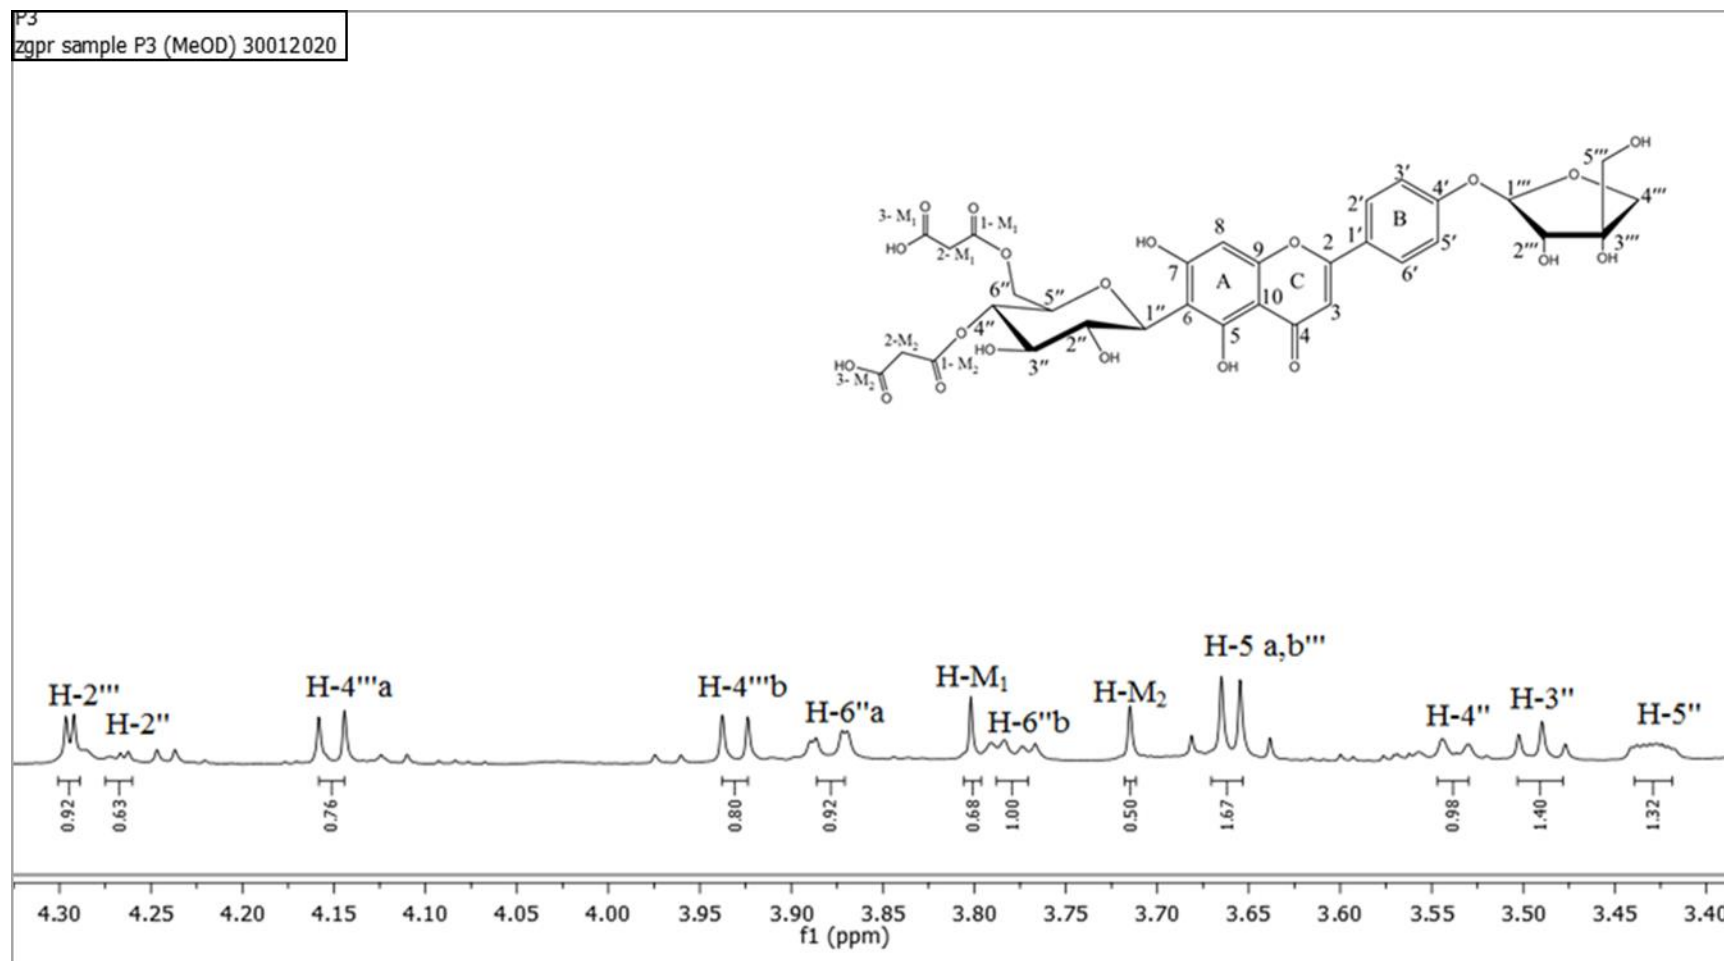

**Figure S30.** Expanded  $^1\text{H}$ -NMR spectrum of sugar signals in apigenin-6-C- $\beta$ -[(4'',6''-O-dimalonyl)-glucoside] 4'-O- $\alpha$ -apiofuranoside (**47**) (700 MHz, in  $\text{CD}_3\text{OD}$ ).

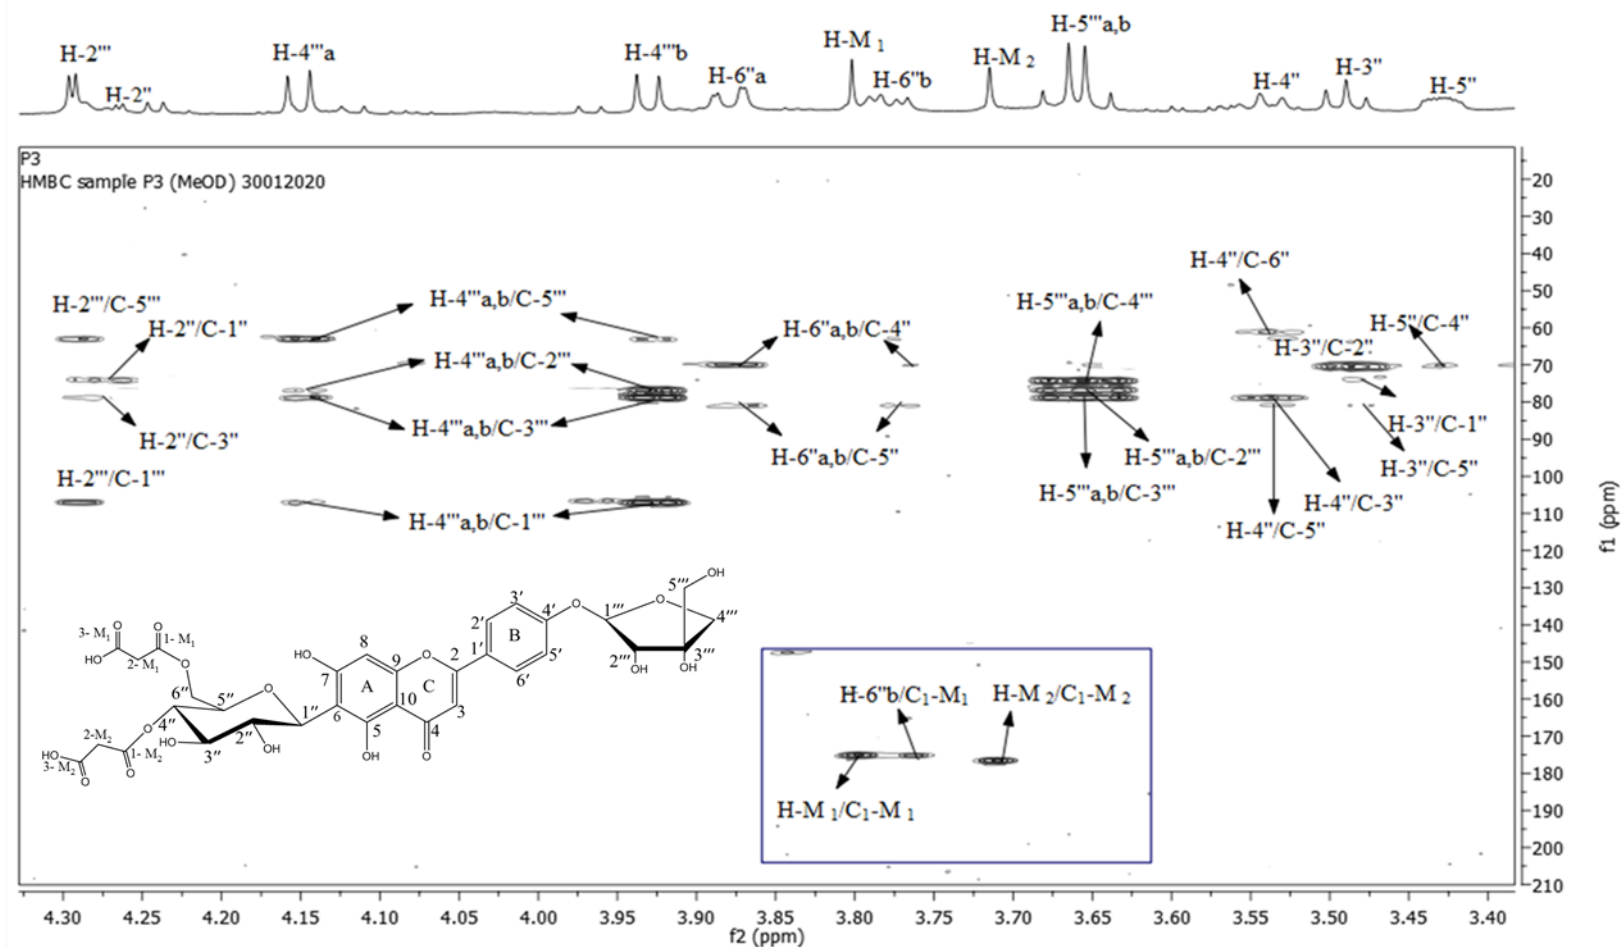

**Figure S31.** HMBC spectrum of apigenin-6-*C*- $\beta$ -[(4'',6''-*O*-dimalonyl)-glucoside] 4'-*O*- $\alpha$ -apiofuranoside (**47**) (700 MHz, in CD<sub>3</sub>OD).
