# Supplementary material for: Metabolite Profiling of Christia vespertilionis Leaf Metabolome via Molecular Network Approach
Source: MDPI journal article supplement (doi:10.3390/app11083526), 2021-04-15
Supplement: s1 [file s1]

Archive with 1 entries (1 files):
- applsci-1140028-supplementary.pdf
